# 1 Investigation of a Pathogenic Inversion in *UNC13D* and Comprehensive Analysis 2 of Chromosomal Inversions Across Diverse Datasets

3 Tugce Bozkurt-Yozgatli<sup>1,2</sup>, Ming Yin Lun<sup>3</sup>, Jesse D. Bengtsson<sup>3</sup>, Ugur Sezerman<sup>1,4</sup>, Ivan K. Chinn<sup>5,6</sup>,  
4 Zeynep Coban-Akdemir<sup>2\*</sup>, Claudia M.B. Carvalho<sup>3\*</sup>

5 <sup>1</sup>*Department of Biostatistics and Bioinformatics, Institute of Health Sciences, Acibadem Mehmet*  
6 *Ali Aydinlar University, Istanbul, Turkey*

7 <sup>2</sup>*Human Genetics Center, Department of Epidemiology, Human Genetics, and Environmental*  
8 *Sciences, School of Public Health, University of Texas Health Science Center at Houston, Houston,*  
9 *TX, USA*

10 <sup>3</sup>*Pacific Northwest Research Institute, Seattle, WA 98122, USA.*

11 <sup>4</sup>*Department of Biostatistics and Medical Informatics, School of Medicine, Acibadem Mehmet Ali*  
12 *Aydinlar University, Istanbul, Turkey.*

13 <sup>5</sup>*Department of Pediatrics, Division of Immunology, Allergy, and Retrovirology, Baylor College of*  
14 *Medicine and Texas Children's Hospital, Houston, TX, USA.*

15 <sup>6</sup>*Center for Human Immunobiology of Texas Children's Hospital/Department of Pediatrics, Baylor*  
16 *College of Medicine, Houston, TX, USA.*

## 17 **\*Co-Corresponding authors:**

18 **Zeynep Coban-Akdemir**, PhD, Assistant Professor, UTHHealth School of Public Health, 1200  
19 Pressler Street, Houston, TX 77030-3900, Email: [Zeynep.H.CobanAkdemir@uth.tmc.edu](mailto:Zeynep.H.CobanAkdemir@uth.tmc.edu), Office:  
20 +1 512 391 2536

21 **Claudia M.B. Carvalho**, PhD, Assistant Investigator, Pacific Northwest Research Institute, 720  
22 Broadway, Seattle, WA 98122, Email: [ccarvalho@pnri.org](mailto:ccarvalho@pnri.org), Office: +1 206 338 0694

## 23 **ABSTRACT**

24 Inversions are known contributors to the pathogenesis of genetic diseases. Identifying inversions  
25 poses significant challenges, making it one of the most demanding structural variants (SVs) to  
26 detect and interpret. Recent advancements in sequencing technologies and the development of  
27 publicly available SV datasets have substantially enhanced our capability to explore inversions.  
28 However, a cross-comparison in those datasets remains unexplored. In this study, we reported a  
29 proband with familial hemophagocytic lymphohistiocytosis type-3 carrying c.1389+1G>A *in trans*  
30 with NC\_000017.11:75576992\_75829587inv disrupting *UNC13D*, an inversion present in  
31 0.006345% of individuals in gnomAD(v4.0). Based on this result, we investigate the features of  
32 potentially pathogenic inversions in public datasets. 98.9% of inversions are rare in gnomAD, and  
33 they disrupt 5% of protein-coding genes associated with a phenotype in OMIM. We then  
34 conducted a comparative analysis of the datasets, including gnomAD, DGV, and 1KGP, and two  
35 recent studies from the Human Genome Structural Variation Consortium revealed common and  
36 dataset-specific inversion characteristics suggesting methodology detection biases. Next, we  
37 investigated the genetic features of inversions disrupting the protein-coding genes by classifying  
38 the intersections between them into three categories. We found that most of the protein-coding  
39 genes in OMIM disrupted by inversions are associated with autosomal recessive phenotypes  
40 regardless of categories supporting the hypothesis that inversions in trans with other variants are  
41 hidden causes of monogenic diseases. This effort aims to fill the gap in our understanding of the  
42 molecular characteristics of inversions with low frequency in the population and highlight the  
43 importance of identifying them in rare disease studies.

44 **Keywords:** Structural variants, genomic disorders, Mendelian diseases, genome sequencing,  
45 optical genome mapping.

## 46 INTRODUCTION

47 Inversions are defined as a type of structural variant (SV) that refers to orientation  
48 changes in DNA segments. They can be copy-number neutral (classical/simple/balanced) with  
49 two breakpoint junctions or be part of complex genomic rearrangements (CGRs) with other copy-  
50 number variations (CNVs) [1]. The main mechanism for the formation of classical inversions has  
51 been proposed to be non-allelic homologous recombination (NAHR) between inverted repeats  
52 [2–4]. Other biological mechanisms may result in inversion formation, including DNA repair-  
53 associated events (non-homologous end joining (NHEJ), and microhomology-mediated end  
54 joining (MMEJ)) and DNA replication-associated events (*e.g.*, fork stalling and template switching)  
55 [1,5].

56 Inversions may have an impact on disease phenotypes, often by directly disrupting a  
57 particular gene [6]. They may occur within a gene, leading to the disease manifestation by causing  
58 the skipping of exonic regions [7]. Mor-Shaked *et al.* reported a pathogenic inversion in *PRKN*,  
59 leading to the skipping of exon 5 in individuals with early-onset Parkinson's disease (PARK2,  
60 OMIM #600116) [7]. Alternatively, one of the inversion breakpoints can disrupt a gene and result  
61 in a disease phenotype [8]. For instance, one of the breakpoints of a 253-kb inversion mapping  
62 to intron 30 of *UNC13D* contributes to the manifestation of familial hemophagocytic  
63 lymphohistiocytosis 3 (FHL3, OMIM #60898) [9,10]. In addition to Mendelian disorders,  
64 inversions are also recognized as significant contributors to common complex disease traits [11–  
65 13] and disease prognosis [14]. Additionally, they can also play a role as genetic modifiers

66 affecting disease phenotypes [15]. Moreover, some inversions have no direct effect on disease  
67 phenotype by themselves, but they may predispose the loci to further genomic rearrangements  
68 with pathogenic consequences [2,16] including the formation of recombinant chromosomes [1].

69 Inversion detection is challenging due to their balanced nature and the fact that  
70 breakpoints often map to repeats. Those features make them undetectable by comparative  
71 genomic hybridization (aCGH) and exome sequencing (ES) [17]. Although short-read whole  
72 genome sequencing (WGS) enables the detection of some inversions, it also introduces the issues  
73 of false positives and the inability to sequence breakpoint junctions in the repetitive parts of the  
74 genome [18,19]. Long-read WGS technologies, including Pacific Biosciences (PacBio) and Oxford  
75 Nanopore (ONT), single-cell template strand sequencing (Strand-seq) [20], and optical genome  
76 mapping [21] have improved our ability to detect inversions since these methodologies are more  
77 suitable to detect changes in DNA orientation including within complex repeat regions [4,22].

78 Published population datasets using different sequencing technologies like those in Ebert  
79 *et al.* [22], and Porubsky *et al.* [4], and publicly available databases such as Genome Aggregation  
80 Database (gnomAD) [23], The Database of Genomic Variants (DGV) [24], and 1000 Genomes  
81 Project (1KGP) [25] provide valuable resources for SV analysis. The recent release of gnomAD  
82 dataset version 4 (v4.0) includes short-read genome sequencing data from 63,046 unrelated  
83 human samples across the world [23]. The DGV dataset is derived from different methodologies  
84 such as sequencing, aCGH, and Fluorescence in situ hybridization (FISH) [24]. Byrska-Bishop *et al.*  
85 released expanded short-read WGS of 1KGP consisting of 3,202 samples, including 602 trios  
86 across diverse global populations [25]. Porubsky *et al.* [4] reported inversions from 41 human  
87 samples by integrating Strand-seq [20], haplotype-resolved *de novo* sequence assemblies

88 generated from PacBio long-reads, and Bionano genomics single-molecule optical mapping [21].  
89 Ebert *et al.* published 64 assembled haplotypes from 32 diverse human genomes using long-read  
90 WGS and strand-seq [22].

91 Here, we report a proband carrying a pathogenic inversion *in trans* with a single-  
92 nucleotide variant (SNV) affecting *UNC13D*. Then, we comprehensively compare inversions  
93 disrupting genes reported in various datasets, gnomAD (v4.0) [23], DGV (release date: 2020-02-  
94 25) [24], 1KGP (release date: 2021-10-05) [25], inversions released by Ebert *et al.* [22] and  
95 Porubsky *et al.* [4] (Figure 1). Our goal is to provide insights into the features of inversions present  
96 in population datasets to genomic disorders.

## 97 **METHODS**

### 98 **Case presentation**

99 The proband (SEA110) is a Caucasian white non-Hispanic, non-Latino male. He was  
100 diagnosed with VACTERL (vertebral defects, anal atresia, cardiac defects, tracheoesophageal  
101 fistula, renal anomalies, and limb abnormalities) after birth. He did not meet early developmental  
102 milestones on time. The patient had frequent respiratory infections that required supplemental  
103 oxygen, including respiratory syncytial virus infection. He presented with pancytopenia at the  
104 range of 11-15 months of life, which was initially felt to be likely viral-mediated. He was  
105 hospitalized and discharged. He seemed well but then developed daily fevers and increased stool  
106 output. He was re-hospitalized and found to have hepatosplenomegaly by abdominal ultrasound.  
107 He then developed acute respiratory failure and required intubation with pressor support.  
108 Laboratory testing ultimately confirmed a diagnosis of hemophagocytic lymphohistiocytosis  
109 (HLH) by HLH-2004 criteria [26]: fever, splenomegaly, anemia with thrombocytopenia,

110 hypofibrinogenemia, hypertriglyceridemia, hyperferritinemia, elevated soluble interleukin-2  
111 receptor levels, and impaired CD107A mobilization. Further clinical information can be provided  
112 upon request from the corresponding author. Initial genetic testing consisted of proband ES and  
113 chromosomal microarray testing, both of which were performed by a commercial clinical  
114 laboratory. Results were reported as negative for both tests. Upon re-hospitalization, clinical  
115 targeted gene panel testing was ordered for inborn errors of immunity and cytopenias, which  
116 identified a pathogenic variant at *UNC13D* c.1389+1G>A.

### 117 **Patient sample collection**

118 As a result of clinical targeted gene panel findings, SEA110 was tested by the Baylor  
119 Genetics Clinical Diagnostic Laboratory using rapid short-read WGS. Informed consent was  
120 obtained for research participation under Pacific Northwest Research Institute approved WCG  
121 IRB Protocol #H-47127\_20202158.

### 122 **DNA Extraction**

123 DNA was extracted from whole blood using the QIAGEN Puregen DNAeasy kit following  
124 the manufacturer's direction with modification of the centrifugation steps, which were extended  
125 to 10 minutes. Ultrahigh molecular weight DNA was extracted from whole blood with the  
126 Bionano SP-G2 Blood and CellCulture DNA Isolation Kit (#80060) following the manufacturer's  
127 direction.

### 128 **ONT-library preparation and sequencing run**

129 DNA from SEA110 was sheared to an N50 of approximately 10 kb using a Covaris g-TUBE  
130 and an Eppendorf 5424 rotor at 5000 rpm. End repair and ligation of adapters for Oxford  
131 nanopore sequencing followed the manufacturer's direction for kit LSK114. Sequencing used

132 Minknow version 23.07.12, with adaptive sampling to enrich for the region of interest. The  
133 enrichment region (chr17:75526717-75896404, GRCh38) and reference as a minimap2 index file  
134 were provided [27]. Following sequencing, passed reads were re-called using guppy 6.0.1 and the  
135 super high accuracy model. Passed reads were mapped to GRCh38 using minimap2 (-Y --  
136 secondary=no -a -x map-ont). After mapping, SN  
137 Vs were called using Clair3 [28] and reads were haplotagged by Whatsp [29].

### 138 **Breakpoint junction amplification and Sanger sequencing**

139 Inversion junctions were amplified using primers reported previously with one additional  
140 sequencing primer (Supplementary Table 1) [9]. Amplification used the Q5 Polymerase (NEB),  
141 and PCR products were gel extracted with the Monarch DNA Gel Extraction kit (NEB) following  
142 the manufacturer's direction. Purified products were sent for Sanger sequencing by GENEWIZ.  
143 Sanger sequencing was analyzed using Geneious Prime software (Dotmatics).

### 144 **Optical Genome Mapping**

145 Ultrahigh molecular weight DNA (UHMW) was labeled with the Bionano Direct Label and  
146 Stain-G2 (DLS2-G2) Kit (#80046) following the manufacturer's direction. In brief, 750 ng of UHMW  
147 DNA was labeled with proprietary green fluorophore (DL-Green), and after purification, the DNA  
148 back bone was stained with a proprietary DNA stain. After staining, the sample was run on a  
149 Bionano Saphyr instrument. A *de novo* assembly was generated in Bionano access version 1.8.1,  
150 with a molecule N50 of 150.38 kb in length and 15.61 labels per 100 kb. The resulting assembly  
151 was compared to the hg38 reference genome, variants were called using Bionano solve version  
152 1.8.1.

### 153 **Datasets utilized in this study**

154 We analyzed the inversions mapped to the reference human genome of hg38 from three  
155 publicly accessible databases, gnomAD (v4.0) [23], DGV (release date: 2020-02-25) [24] and 1KGP  
156 (release date: 2021-10-05) [25], and two recent studies of Ebert *et al.* [22] and Porubsky *et al.* [4]  
157 (Figure 1). We extracted inversion calls in autosome (chr1-22) and sex (chrX and chrY)  
158 chromosomes from the datasets. The gnomAD (v4.0) [23] SV dataset was downloaded from  
159 <https://gnomad.broadinstitute.org/downloads>. The DGV [24] SV dataset was downloaded from  
160 the link: [http://dgv.tcag.ca/dgv/docs/GRCh38\\_hg38\\_variants\\_2020-02-25.txt](http://dgv.tcag.ca/dgv/docs/GRCh38_hg38_variants_2020-02-25.txt). DGV [24] includes  
161 inversions from several studies (Supplementary table 2) derived from different methodologies,  
162 including sequencing, oligo aCGH, and FISH. We included inversions detected by all of these  
163 studies. SV data in the 1KGP was downloaded from the following link:  
164 <https://www.internationalgenome.org/data-portal/data-collection/30x-grch38>. The updated  
165 callset to the original release of the inversions reported by Ebert *et al.* [22] was downloaded from  
166 the following link:  
167 [http://ftp.1000genomes.ebi.ac.uk/vol1/ftp/data\\_collections/HGSVC2/release/v2.0/integrated  
168 callset/](http://ftp.1000genomes.ebi.ac.uk/vol1/ftp/data_collections/HGSVC2/release/v2.0/integrated_callset/). Lastly, we included the inversions reported by Porubsky *et al.* [4].

## 169 Gene Annotations

170 We downloaded the gene regions with their canonical transcripts present in the hg38  
171 version of the GENCODE (v46) database (Data update date: 2024-04-02) through the University  
172 of California Santa Cruz (UCSC) [30] to identify the inversions intersecting with the human  
173 protein-coding genes. We filtered the dataset to extract only the genes with protein-coding  
174 transcripts, excluding those with other transcript types. (Supplementary figure 1). Then, we  
175 retained the genes in human autosome chromosomes (chr1-22) and sex chromosomes (chrX and



176 chrY). We also downloaded the dataset of the Online Mendelian Inheritance in Man (OMIM)  
177 (data freeze date: 06-18-2024) [31] (<https://www.omim.org/downloads>) as well as rare disease-  
178 related genes in Orphanet data (<https://www.orphadata.com/genes/>).

### 179 **Analysis of inversions intersecting inversions in other datasets and protein-coding genes**

180 We used the Bedtools (v2.30.0) [32] intersect function with the fraction option 0.5 to  
181 detect the overlap between inversion locations in different datasets. Bedtools intersect function  
182 takes a genomic feature as the first input and finds overlapped regions between another genomic  
183 feature as the second input. The fraction option 0.5 allows us to find the overlap, including at  
184 least 50% of the sequence length of inversions. We also implemented the Bedtools (v2.30.0) [32]  
185 intersect function with the default parameters to detect the overlap between inversions and  
186 protein-coding genes. The intersections between inversions and human protein-coding genes  
187 were classified into three distinct categories. In category 1, inversions cover genes; in category 2,  
188 one of the inversion breakpoints maps within a gene; in category 3, inversions map entirely within  
189 genes (Figure 1).

### 190 **Enrichment analysis of the genes intersecting inversions**

191 We performed gene set enrichment analysis with the protein-coding genes overlapping  
192 with inversions in categories 2 and 3 by applying Enrichr [33]. The list of the genes intersecting  
193 inversions in each intersection category was given as input to Enrichr [33]. Then, we reported the  
194 Human Phenotype Ontology (HPO) terms enriched by these genes.

### 195 **Computational Analysis**

196 Computational analyses were carried out using R (v.4.2.0) [34]. The plots were generated  
197 using the package ggplot2 [35] and the UpSet R package [36].

## 198 RESULTS

### 199 A pathogenic *UNC13D* inversion is present in gnomAD

200 We identified an inversion accompanied by the canonical donor splice site SNV in *UNC13D*  
201 in SEA110 (Figure 2 and Supplementary figure 2). The 253-kb inversion has been documented in  
202 individuals with Swedish ancestry and reported to cause FHL3 when inherited as homozygous or  
203 *in trans* with pathogenic SNVs and small indels in *UNC13D* [9,10]. We observed an almost  
204 identical inversion reported in gnomAD at coordinates chr17:75576924-75829482  
205 (INV\_CHR17\_66182818), which is present in 0.006345%, exclusively in heterozygous state in  
206 individuals from European Finnish and Admixed American populations (Supplementary Figure 3).  
207 The SEA110 inversion shows two breakpoint junctions with 111 (junction 1) and 23 (junction 2)  
208 nucleotides similarity generated by *Alu-Alu* mediated rearrangement (AAMR) (Figure 2). Parental  
209 samples are not available to test for inheritance; therefore, we do not have information about  
210 ancestry and cannot investigate whether this inversion is the same reported in gnomAD (a  
211 potential founder event) or if it is a recurrent inversion generated independently via AAMR in  
212 this proband. Optical Genome Mapping supports the breakpoint junctions of the inversion  
213 obtained by Sanger sequencing. The detected inversion has multiple molecules spanning both  
214 breakpoints and several molecules spanning the entire inversion supporting the inversion call.  
215 Bionano solve software called the inversion as heterozygous, but lack of label density in *UNC13D*  
216 results in the exclusion of *UNC13D* from the called inversion. ONT sequencing was applied to  
217 confirm heterozygosity, and manual phasing indicated the pathogenic SNV and inversions are *in*  
218 *trans* (Figure 2C).

### 219 Inversions in gnomAD (v4.0) are rare and affect protein-coding genes

220 We hypothesized that pathogenic inversions are present as rare alleles in the general  
221 population. To investigate this concept, we categorized 2185 inversions in gnomAD into two  
222 groups: Rare (allele frequency <5%) and common (allele frequency  $\geq$ 5%). Altogether, 2,161  
223 (98.9%) inversions are rare; 24 inversions (1.1%) are common in gnomAD (Supplementary figure  
224 4A).

225 We investigated the human protein-coding genes affected by rare and common  
226 inversions in gnomAD. We analyzed 19,697 protein-coding genes in GENCODE (v46); 4,921 are  
227 related to a phenotype in OMIM, 11,306 are not yet linked with a phenotype in OMIM, and 3,470  
228 genes are not cataloged in OMIM. We overlapped inversions in gnomAD and protein-coding  
229 genes and categorized the intersections into three groups (Category 1, category 2, and category  
230 3). Next, we focused on the inversions in categories 2 and 3 since they can be critical mechanisms  
231 for disease pathology (Supplementary table 3). 279 rare gnomAD inversions affect 5% of genes  
232 associated with a phenotype in OMIM (247 out of 4,921; Supplementary figure 4C) in contrast  
233 with 4.6% of genes not associated with a phenotype in OMIM (521 out of 11,306; Supplementary  
234 Figure 4C) based on categories 2 and 3. Furthermore, 254 out of 279 rare gnomAD inversions  
235 have not been found in the homozygous state and affect 106 autosomal recessive (AR) disease  
236 genes (Supplementary table 4).

### 237 **Features of the inversions reported in distinct datasets**

238 To compare the characteristics of inversions in gnomAD [23] with other publicly available  
239 datasets, we conducted a comparative analysis using inversion data from DGV [24], 1KGP [25],  
240 and two recent publications of Ebert *et al.* [22] and Porubsky *et al.* [4] (Figure 1).

241 We extracted 2,185 inversions from gnomAD, 3,468 inversions from DGV, 920 inversions  
242 from 1KGP, 414 inversions from the data released by Ebert *et al.*, and 339 inversions from the  
243 callset published by Porubsky *et al.* The summary statistics of inversion length in each dataset are  
244 provided in Table 1. gnomAD shows a more even distribution regarding size and displays the  
245 largest events (Supplementary figure 5), including a 118.67 Mb pericentric inversion  
246 (INV\_CHR5\_77480914). Most of DGV inversions (75%) are between 0.035 kb and 24.22 kb. 1KGP  
247 inversions tend to be smaller as the median length of 0.831 kb, whereas Ebert *et al.* and Porubsky  
248 *et al.* show the highest median length of 293.19 kb and 251.71 kb, respectively.

#### 249 **Estimating redundancy among the inversions available from different datasets**

250 We investigated the number of common and dataset-specific inversions across different  
251 datasets using very stringent criteria based on the start and end locations of the inversions  
252 (Supplementary figure 6). Redundancies in the datasets are expected due to the overlap of  
253 samples reported in distinct publications (*e.g.*, Ebert *et al.* and Porubsky *et al.*) or inclusion of  
254 datasets into publicly shared ones (*e.g.*, gnomAD v.2 is included in DGV). We observed very little  
255 redundancy for inversions among the individual datasets (Supplementary figure 6) because the  
256 different applied sequencing technologies provided distinct resolutions concerning breakpoint  
257 junctions. We then decreased the stringency to intersect inversions in each dataset with at least  
258 50% of their sequence (Supplementary figure 7). The inversions in gnomAD and DGV share (49.4%  
259 and 77.2%) more inversions with each other compared to other datasets. 78.3% of 1KGP  
260 inversions overlap with at least one inversion in gnomAD. Around 70% of inversions in Ebert *et*  
261 *al.* and Porubsky *et al.* overlap with each other.

#### 262 **Inversions disrupting genes**

263 We overlapped the inversions in the datasets with the protein-coding genes. Then, we  
264 classified the overlaps between inversions and protein-coding genes into three categories, as  
265 defined previously defined in this manuscript (Figure 1). The majority of the overlaps from all  
266 datasets, except 1KGP, map with category 1 (76.8% in DGV to 97.1% in gnomAD). 65.9% of  
267 inversion-gene intersections belong to category 3 in 1KGP (Figure 3).

268 Next, we focused on the inversions in categories 2 and 3 since they can be critical  
269 mechanisms for disease pathology (Supplementary table 5 and 6). We delved deep into the  
270 protein-coding genes associated with clinical phenotypes in OMIM disrupted by inversions in this  
271 intersection between categories 2 and 3. In total, 847 inversions have one breakpoint junction  
272 mapping to 830 protein-coding genes based on category 2 and can be potentially relevant to  
273 genetic disorders (Supplementary table 5). On the other hand, in total, breakpoint junctions of  
274 1,586 inversions are within 1030 protein-coding genes based on category 3 and can also be  
275 potentially relevant to genetic disorders (Supplementary table 6). Interestingly, both DGV and  
276 gnomAD inversions show higher frequencies of disrupting genes associated with disease  
277 compared to other datasets (1.6% and 2.1%, respectively) in Category 2 (Supplementary figure  
278 8A). Importantly, inversions in both datasets also disrupt a higher proportion of OMIM  
279 phenotype-related genes in Category 3 (3.7% and 3.2%, respectively), while Porubsky *et al.* has a  
280 smaller proportion (0.2%, Supplementary figure 8B). The inheritance pattern of the genes  
281 overlapping with inversions for categories 2 and 3 for each dataset is given in Supplementary  
282 figure 8C and D. About 40.9% and 50% of the inversions in both categories 2 and 3 regardless of  
283 dataset are in AR disease genes (Supplementary figure 8C and D). Autosomal dominant (AD)

284 inheritance is the second most prominent disease gene pattern (16.7% and 33.8%,  
285 Supplementary figure 8C and D).

286 We then performed gene set enrichment analysis with all protein-coding genes in the  
287 datasets that intersect with the protein-coding genes following categories 2 and 3. All enriched  
288 HPO terms belonging to each category are provided in Supplementary table 7 and 8.

## 289 **DISCUSSION**

290 In this study, we reported a case with c.1389+1G>A and NC\_000017.11:  
291 75576992\_75829587inv in *UNC13D* presenting with an FHL3 phenotype. The inversion in the  
292 patient disrupts *UNC13D* following category 2 (Figure 2). The pathogenic inversion is present in  
293 heterozygosity in gnomAD (v4.0) in individuals from European Finnish and Admixed American  
294 populations (Supplementary Figure 3). To identify more inversions that are likely pathogenic like  
295 the one in *UNC13D*, we delved deep into gnomAD inversions. We extensively investigated  
296 gnomAD inversions to gain a comprehensive understanding of inversions in an individual  
297 genome. 279 rare inversions in gnomAD affect 247 protein-coding genes associated with a  
298 phenotype in OMIM based on categories 2 and 3; 254 of them have not been found in the  
299 homozygous state and overlap with 106 AR disease genes (Supplementary table 4), similar to the  
300 overlap between INV\_CHR17\_66182818 and *UNC13D*. For instance, 15,736-bp inversion in  
301 gnomAD, INV\_chr1\_04df2580,  
302 ([https://gnomad.broadinstitute.org/variant/INV\\_CHR1\\_04DF2580?dataset=gnomad\\_sv\\_r4](https://gnomad.broadinstitute.org/variant/INV_CHR1_04DF2580?dataset=gnomad_sv_r4))  
303 disrupts *DPYD* with the breakpoint junctions in intron 12 and intron 8 of *DPYD*. Van Kuilenburg *et*  
304 *al.* has reported a 115,731-bp inversion with breakpoints in intron 8 and intron 12 of *DPYD* in a  
305 patient with Dihydropyrimidine dehydrogenase deficiency (OMIM #274270) [37].

306           Then, we conducted analyses on inversions from diverse datasets. It is important to  
307 highlight that these inversions were derived from different sequencing technologies (Table 1).  
308 While the inversions in 1KGP and gnomAD were detected using short-read WGS, the inversions  
309 reported by Ebert *et al.* and Porubsky *et al.* were identified by long-read WGS and Strand-seq.  
310 Strand-seq was shown to be the ideal technology to detect inversions, especially those mediated  
311 by large segmental duplications or other genomic repeats which often happen as a result of  
312 NAHR; 72% of balanced inversions in Porubsky *et al.* are generated by NAHR [4,22]. In contrast,  
313 short-reads are not suitable to identify such inversions, although it can resolve inversions with  
314 blunt or microhomology at the breakpoint junctions such as those generated by NHEJ [1].  
315 Therefore, while we expected to detect redundancy among datasets, we also expected to identify  
316 unique inversions only identifiable by certain methodologies but invisible to others. While  
317 between 11.1% to 49.4% of the inversions in gnomAD overlap with inversions in other datasets,  
318 from 21.6% to 76.4% of inversions in Porubsky *et al.* overlap with inversions in other datasets.  
319 Strikingly, gnomAD (v4.0) has inversions with a longer length and a higher number of larger  
320 inversions (median length of 7.1 kb), which raises the question of whether Mb size inversions,  
321 including pericentric ones, are more often generated by NHEJ (Table 1). In fact, we have  
322 investigated large inversions detected by karyotyping (8 Mb to 178 Mb) in a diagnostic setting,  
323 and found that none of the resolved inversions (13/18 or 72%) are mediated by repeats [1] which  
324 has been confirmed by a second more recent study [38]. Besides, it should be taken into account  
325 that these inversions were generated by different SV callers, and these tools exhibit different  
326 false positive rates [18,39]. These potential false calls may overlap with protein-coding genes in  
327 our analysis. Also, redundancies in these datasets will occur due to the same ancestral inversions

328 being reported from distinct individuals while identified by distinct technologies, due to analysis  
329 of similar samples or due to the incorporation of entire datasets into larger ones, *e.g.*, DGV  
330 incorporates 1KGP phase 3 (Supplementary table 2).

331         Next, we examined whether the inversions in all datasets disrupt human protein-coding  
332 genes by classifying inversion-gene intersections into three different categories (Figure 1). The  
333 majority of the overlaps in all datasets except 1KGP are from category 1 (Figure 3) which is  
334 consistent with the small inversion sizes in 1KGP (Supplementary Figure 5, Table 1) but also  
335 indicates that inversions in 1KGP often have both breakpoints within genes which potentially can  
336 lead to truncated transcripts subjected to nonsense mediated decay (NMD) or to exon skipping.  
337 The results also show that most of the inversions intersecting with protein-coding genes in the  
338 other datasets are longer than the gene length. Besides, 97.1% of intersections in gnomAD belong  
339 to category 1, consistent with gnomAD presenting longer inversions compared to other datasets  
340 (Table 1). Next, we focused on the protein-coding genes that are associated with a phenotype in  
341 OMIM disrupted by inversions. Upon examining the genes overlapping with the inversions in  
342 categories 2 and 3, we found that most genes intersecting with inversions across all datasets  
343 belong to the AR group, while AD disease genes are the second most prominent group. (Figure  
344 4B and Figure 4C). Inversions that disrupt AD disease genes can also be particularly noteworthy,  
345 as they might introduce genomic instability in these regions, potentially leading to the formation  
346 of other SVs [16].

347         The number of inversions involving protein-coding genes associated with one or more  
348 phenotypes is markedly distinct in each dataset, with gnomAD and DGV showing a higher overlap  
349 rate with OMIM phenotype-related genes than other datasets (Supplementary Figure 8). We



350 observed that the genes disrupted by inversions in categories 2 and 3 are associated with both  
351 Mendelian disorders, such as Spinocerebellar ataxia 31 (OMIM #619422), and complex disease  
352 traits, such as susceptibility to autism (OMIM #618830).

353 We further performed gene set enrichment analysis on the genes interrupted by  
354 inversions in categories 2 and 3. All enriched HPO terms except Autosomal dominant inheritance  
355 (HP:0000006) for category 3 are statistically insignificant (Supplementary table 7 and 8). This  
356 result might be expected since we used diverse genes that overlap inversions in the whole  
357 genome. Nevertheless, we still report the list of HPO terms enriched by the genes disrupted by  
358 inversions to be able to gain an insight into these genes and their related phenotypes.

359 Finally, sequencing technologies, including short-read WGS, long-read WGS, Strand-seq,  
360 and optical mapping, have significantly contributed to the discovery of inversions. Publicly  
361 accessible datasets using these technologies are important resources that may facilitate  
362 discoveries of pathogenic inversions underlying various disease traits. This study sheds light on  
363 the possible impact of the inversions in these datasets on revealing disease phenotypes.

## 364 **DATA AVAILABILITY**

365 Gnomad SV data: <https://gnomad.broadinstitute.org/downloads>

366 DGV SV data: [http://dgv.tcag.ca/dgv/docs/GRCh38\\_hg38\\_variants\\_2020-02-25.txt](http://dgv.tcag.ca/dgv/docs/GRCh38_hg38_variants_2020-02-25.txt)

367 1KGP SV data: <https://www.internationalgenome.org/data-portal/data-collection/30x-grch38>

368 The updated callset to the original release of the inversions reported by Ebert *et al.* [22]:

369 [http://ftp.1000genomes.ebi.ac.uk/vol1/ftp/data\\_collections/HGSVC2/release/v2.0/integrated](http://ftp.1000genomes.ebi.ac.uk/vol1/ftp/data_collections/HGSVC2/release/v2.0/integrated)  
370 [callset/](#)

371 GENCODE v46: <https://genome.ucsc.edu/cgi-bin/hgTables>

372 OMIM gene list: <https://www.omim.org/downloads>

373 Orphanet gene list: <https://www.orphadata.com/genes/>

## 374 **CODE AVAILABILITY**

375 The script for data analysis in this manuscript is available at [https://github.com/Carvalho-](https://github.com/Carvalho-Lab/Tugce_INV/tree/main)  
376 [Lab/Tugce\\_INV/tree/main](https://github.com/Carvalho-Lab/Tugce_INV/tree/main).

## 377 **REFERENCES**

- 378 1. Pettersson M, Grochowski CM, Wincent J, Einfeldt J, Breman AM, Cheung SW, et al.  
379 Cytogenetically visible inversions are formed by multiple molecular mechanisms. Human  
380 Mutation. 2020;41:1979–98.
- 381 2. Flores M, Morales L, Gonzaga-Jauregui C, Domínguez-Vidaña R, Zepeda C, Yañez O, et al.  
382 Recurrent DNA inversion rearrangements in the human genome. Proc Natl Acad Sci USA.  
383 2007;104:6099–106.
- 384 3. Kidd JM, Cooper GM, Donahue WF, Hayden HS, Samps N, Graves T, et al. Mapping and  
385 sequencing of structural variation from eight human genomes. Nature. 2008;453:56–64.
- 386 4. Porubsky D, Höps W, Ashraf H, Hsieh P, Rodriguez-Martin B, Yilmaz F, et al. Recurrent  
387 inversion polymorphisms in humans associate with genetic instability and genomic disorders.  
388 Cell. 2022;185:1986-2005
- 389 5. Carvalho CMB, Lupski JR. Mechanisms underlying structural variant formation in genomic  
390 disorders. Nat Rev Genet. 2016;17:224–38.

- 391 6. Puig M, Casillas S, Villatoro S, Cáceres M. Human inversions and their functional  
392 consequences. *Brief Funct Genomics*. 2015;14:369–79.
- 393 7. Mor-Shaked H, Paz-Ebstein E, Basal A, Ben-Haim S, Grobe H, Heymann S, et al. Levodopa-  
394 responsive dystonia caused by biallelic *PRKN* exon inversion invisible to exome sequencing.  
395 *Brain Communications*. 2021;3:fcab197.
- 396 8. Jones ML, Murden SL, Brooks C, Maloney V, Manning RA, Gilmour KC, et al. Disruption of  
397 *AP3B1* by a chromosome 5 inversion: a new disease mechanism in Hermansky-Pudlak syndrome  
398 type 2. *BMC Medical Genetics*. 2013;14:42.
- 399 9. Meeths M, Chiang SCC, Wood SM, Entesarian M, Schlums H, Bang B, et al. Familial  
400 hemophagocytic lymphohistiocytosis type 3 (*FHL3*) caused by deep intronic mutation and  
401 inversion in *UNC13D*. *Blood*. 2011;118:5783–93.
- 402 10. Qian Y, Johnson JA, Connor JA, Valencia CA, Barasa N, Schubert J, et al. The 253-kb inversion  
403 and deep intronic mutations in *UNC13D* are present in North American patients with familial  
404 hemophagocytic lymphohistiocytosis 3. *Pediatric Blood & Cancer*. 2014;61:1034–40.
- 405 11. de Jong S, Chepelev I, Janson E, Strengman E, van den Berg LH, Veldink JH, et al. Common  
406 inversion polymorphism at 17q21.31 affects expression of multiple genes in tissue-specific  
407 manner. *BMC Genomics*. 2012;13:458.
- 408 12. Pilbrow AP, Lewis KA, Perrin MH, Sweet WE, Moravec CS, Tang WHW, et al. Cardiac *CRFR1*  
409 Expression Is Elevated in Human Heart Failure and Modulated by Genetic Variation and  
410 Alternative Splicing. *Endocrinology*. 2016;157:4865–74.

- 411 13. González JR, Ruiz-Arenas C, Cáceres A, Morán I, López-Sánchez M, Alonso L, et al.  
412 Polymorphic Inversions Underlie the Shared Genetic Susceptibility of Obesity-Related Diseases.  
413 The American Journal of Human Genetics. 2020;106:846–58.
- 414 14. Ruiz-Arenas C, Cáceres A, Moreno V, González JR. Common polymorphic inversions at  
415 17q21.31 and 8p23.1 associate with cancer prognosis. Hum Genomics. 2019;13:57.
- 416 15. Nomura T, Suzuki S, Miyauchi T, Takeda M, Shinkuma S, Fujita Y, et al. Chromosomal  
417 inversions as a hidden disease-modifying factor for somatic recombination phenotypes. JCI  
418 Insight. 2018;3:e97595.
- 419 16. Osborne LR, Li M, Pober B, Chitayat D, Bodurtha J, Mandel A, et al. A 1.5 million–base pair  
420 inversion polymorphism in families with Williams-Beuren syndrome. Nat Genet. 2001;29:321–5.
- 421 17. Vicente-Salvador D, Puig M, Gayà-Vidal M, Pacheco S, Giner-Delgado C, Noguera I, et al.  
422 Detailed analysis of inversions predicted between two human genomes: errors, real  
423 polymorphisms, and their origin and population distribution. Human Molecular Genetics.  
424 2017;26:567–81.
- 425 18. Chaisson MJP, Sanders AD, Zhao X, Malhotra A, Porubsky D, Rausch T, et al. Multi-platform  
426 discovery of haplotype-resolved structural variation in human genomes. Nat Commun.  
427 2019;10:1784.
- 428 19. Cameron DL, Di Stefano L, Papenfuss AT. Comprehensive evaluation and characterisation of  
429 short read general-purpose structural variant calling software. Nat Commun. 2019;10:3240.

- 430 20. Falconer E, Hills M, Naumann U, Poon SSS, Chavez EA, Sanders AD, et al. DNA template  
431 strand sequencing of single-cells maps genomic rearrangements at high resolution. *Nat*  
432 *Methods*. 2012;9:1107–12.
- 433 21. Lam ET, Hastie A, Lin C, Ehrlich D, Das SK, Austin MD, et al. Genome mapping on  
434 nanochannel arrays for structural variation analysis and sequence assembly. *Nat Biotechnol*.  
435 2012;30:771–6.
- 436 22. Ebert P, Audano PA, Zhu Q, Rodriguez-Martin B, Porubsky D, Bonder MJ, et al. Haplotype-  
437 resolved diverse human genomes and integrated analysis of structural variation. *Science*.  
438 2021;372:eabf7117.
- 439 23. Collins RL, Brand H, Karczewski KJ, Zhao X, Alföldi J, Francioli LC, et al. A structural variation  
440 reference for medical and population genetics. *Nature*. 2020;581:444–51.
- 441 24. MacDonald JR, Ziman R, Yuen RKC, Feuk L, Scherer SW. The Database of Genomic Variants:  
442 a curated collection of structural variation in the human genome. *Nucl Acids Res*.  
443 2014;42:D986–92.
- 444 25. Byrska-Bishop M, Evani US, Zhao X, Basile AO, Abel HJ, Regier AA, et al. High-coverage  
445 whole-genome sequencing of the expanded 1000 Genomes Project cohort including 602 trios.  
446 *Cell BABABAB*. 2022;185:3426-3440.e19.
- 447 26. Henter J-I, Horne A, Aricó M, Egeler RM, Filipovich AH, Imashuku S, et al. HLH-2004:  
448 Diagnostic and therapeutic guidelines for hemophagocytic lymphohistiocytosis. *Pediatr Blood*  
449 *Cancer*. 2007;48:124–31.

- 450 27. Li H. Minimap2: pairwise alignment for nucleotide sequences. *Bioinformatics*.  
451 2018;34:3094–100.
- 452 28. Zheng Z, Li S, Su J, Leung AW-S, Lam T-W, Luo R. Symphonizing pileup and full-alignment for  
453 deep learning-based long-read variant calling. *Nat Comput Sci*. 2022;2:797–803.
- 454 29. Martin M, Patterson M, Garg S, Fischer SO, Pisanti N, Klau GW, et al. WhatsHap: fast and  
455 accurate read-based phasing [Internet]. *bioRxiv*; 2016 [cited 2024 Apr 23]. p. 085050. Available  
456 from: <https://www.biorxiv.org/content/10.1101/085050v2>
- 457 30. Haeussler M, Zweig AS, Tyner C, Speir ML, Rosenbloom KR, Raney BJ, et al. The UCSC  
458 Genome Browser database: 2019 update. *Nucleic Acids Research*. 2019;47:D853–8.
- 459 31. Amberger JS, Bocchini CA, Scott AF, Hamosh A. OMIM.org: leveraging knowledge across  
460 phenotype–gene relationships. *Nucleic Acids Research*. 2019;47:D1038–43.
- 461 32. Quinlan AR, Hall IM. BEDTools: a flexible suite of utilities for comparing genomic features.  
462 *Bioinformatics*. 2010;26:841–2.
- 463 33. Chen EY, Tan CM, Kou Y, Duan Q, Wang Z, Meirelles GV, et al. Enrichr: interactive and  
464 collaborative HTML5 gene list enrichment analysis tool. *BMC Bioinformatics*. 2013;14:128.
- 465 34. R Core Team. R: A Language and Environment for Statistical Computing [Internet]. Vienna,  
466 Austria: R Foundation for Statistical Computing; 2023. Available from: [https://www.R-](https://www.R-project.org/)  
467 [project.org/](https://www.R-project.org/)

468 35. Hadley Wickham. ggplot2: Elegant Graphics for Data Analysis [Internet]. Springer-Verlag  
469 New York; 2016. Available from: <https://ggplot2.tidyverse.org>

470 36. Conway JR, Lex A, Gehlenborg N. UpSetR: an R package for the visualization of intersecting  
471 sets and their properties. *Bioinformatics*. 2017;33:2938–40.

472 37. Van Kuilenburg ABP, Tarailo-Graovac M, Meijer J, Drogemoller B, Vockley J, Maurer D, et al.  
473 Genome sequencing reveals a novel genetic mechanism underlying dihydropyrimidine  
474 dehydrogenase deficiency: A novel missense variant c.1700G>A and a large intragenic inversion  
475 in *DPYD* spanning intron 8 to intron 12. *Human Mutation*. 2018;39:947–53.

476 38. Bilgrav Saether K, Eisfeldt J, Bengtsson J, Lun MY, Grochowski CM, Mahmoud M, et al. Mind  
477 the gap: the relevance of the genome reference to resolve rare and pathogenic inversions.  
478 medRxiv. 2024;2024.04.22.24305780.

479 39. Kosugi S, Momozawa Y, Liu X, Terao C, Kubo M, Kamatani Y. Comprehensive evaluation of  
480 structural variation detection algorithms for whole genome sequencing. *Genome Biol*.  
481 2019;20:117.

## 482 **ACKNOWLEDGEMENTS**

483 We thank the patient and family for participation in this study.

## 484 **AUTHOR CONTRIBUTIONS**

485 Conceptualization: CMBC, ZCA; Data Analysis: TBY and JDB; Funding acquisition: CMBC; Clinical  
486 data: IKC; Supervision: CMBC and ZCA; Writing, review, and editing: TBY, MYL, JDB, US, IKC, ZCA,  
487 and CMBC. All authors have read and approved the final manuscript.

## 488 **FUNDING**

489 This work was supported in part by the United States National Institute of General Medical  
490 Sciences NIGMS R01 GM132589 (CMBC). IKC was supported by the Jeffrey Modell Foundation at  
491 Texas Children’s Hospital. TBY was supported by the Turkish Scientific and Technological  
492 Research Council (TUBITAK) 2214-A Program.

## 493 **COMPETING INTERESTS**

494 The authors declare no competing interests.

## 495 **ETHICAL APPROVAL**

496 This study is approved by the Baylor College of Medicine (BCM) Institutional Review Board and  
497 WIRB for the Pacific Northwest Research Institute (IRB Protocol #H-47127/20202158).

## 498 **TABLES**

499 Table 1. Summary statistics of the datasets analyzed in this study.

| <b>Dataset</b>                        | <b>Sequencing technology</b> | <b>Number of inversions</b> | <b>Minimum length (kb)</b> | <b>1<sup>st</sup> Quartile (kb)</b> | <b>Median length (kb)</b> | <b>Mean length (kb)</b> | <b>3<sup>rd</sup> Quartile (kb)</b> | <b>Maximum length (kb)</b> |
|---------------------------------------|------------------------------|-----------------------------|----------------------------|-------------------------------------|---------------------------|-------------------------|-------------------------------------|----------------------------|
| <b>gnomAD-SV (v4.0)</b>               | Short-read WGS               | 2185                        | 0.052                      | 0.896                               | 7.1                       | 2402.4                  | 323.63                              | 118667.16                  |
| <b>DGV (release date: 2020-02-25)</b> | Mixed                        | 3468                        | 0.035                      | 0.395                               | 2.67                      | 168.5                   | 24.3                                | 9734                       |
| <b>1KGP (release date:)</b>           | Short-read WGS               | 920                         | 0.052                      | 0.238                               | 0.831                     | 9.41                    | 6.16                                | 98.73                      |



| 2021-10-05)                        |                                                            |     |       |      |       |        |        |          |
|------------------------------------|------------------------------------------------------------|-----|-------|------|-------|--------|--------|----------|
| <b>Ebert <i>et al.</i> 2021</b>    | Long-read WGS, Strand-seq                                  | 414 | 0.3   | 8.13 | 23.94 | 293.19 | 87.63  | 57207.41 |
| <b>Porubsky <i>et al.</i> 2022</b> | Long-read WGS, Strand-seq, Single-molecule optical mapping | 399 | 0.236 | 4.67 | 20.73 | 251.71 | 114.28 | 23268.23 |

500

501 **FIGURES**

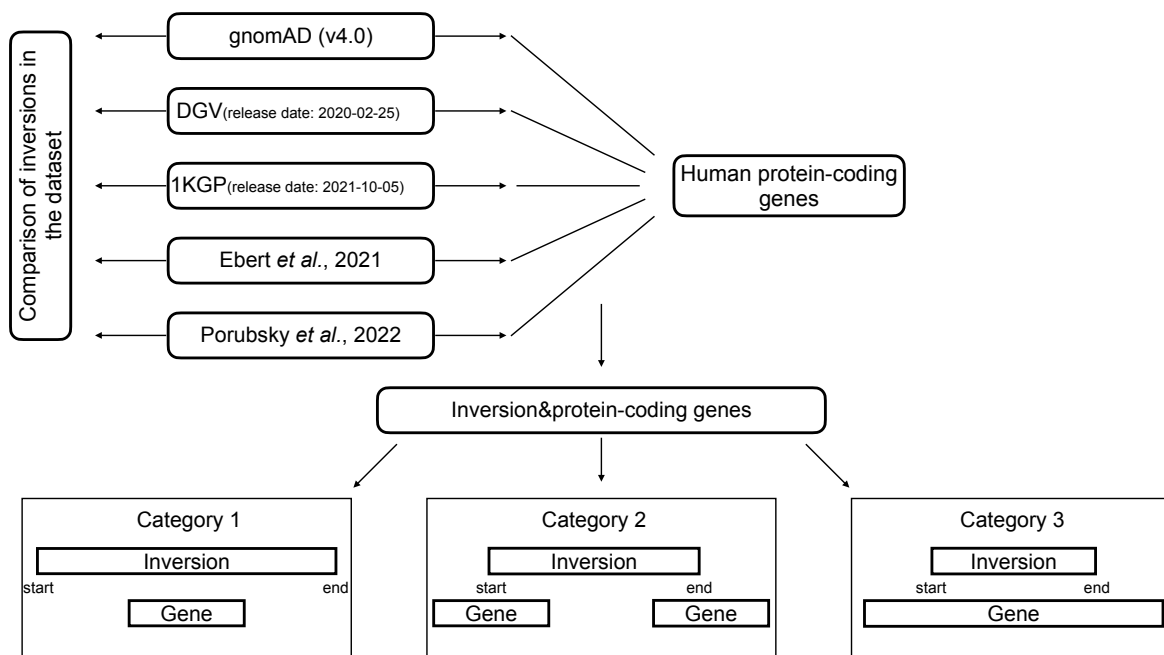

502

503 Figure 1. Overview of the datasets and the study design. We extracted inversions from publicly

504 available databases, gnomAD (v4.0) [23], DGV (release date: 2020-02-25) [24], 1KGP (release

505 date: 2021-10-05) [25] and two recent publications of Ebert *et al.* [22] and Porubsky *et al.* [4] We

506 then intersect inversions with OMIM genes and grouped inversion-gene intersections into three  
 507 categories.

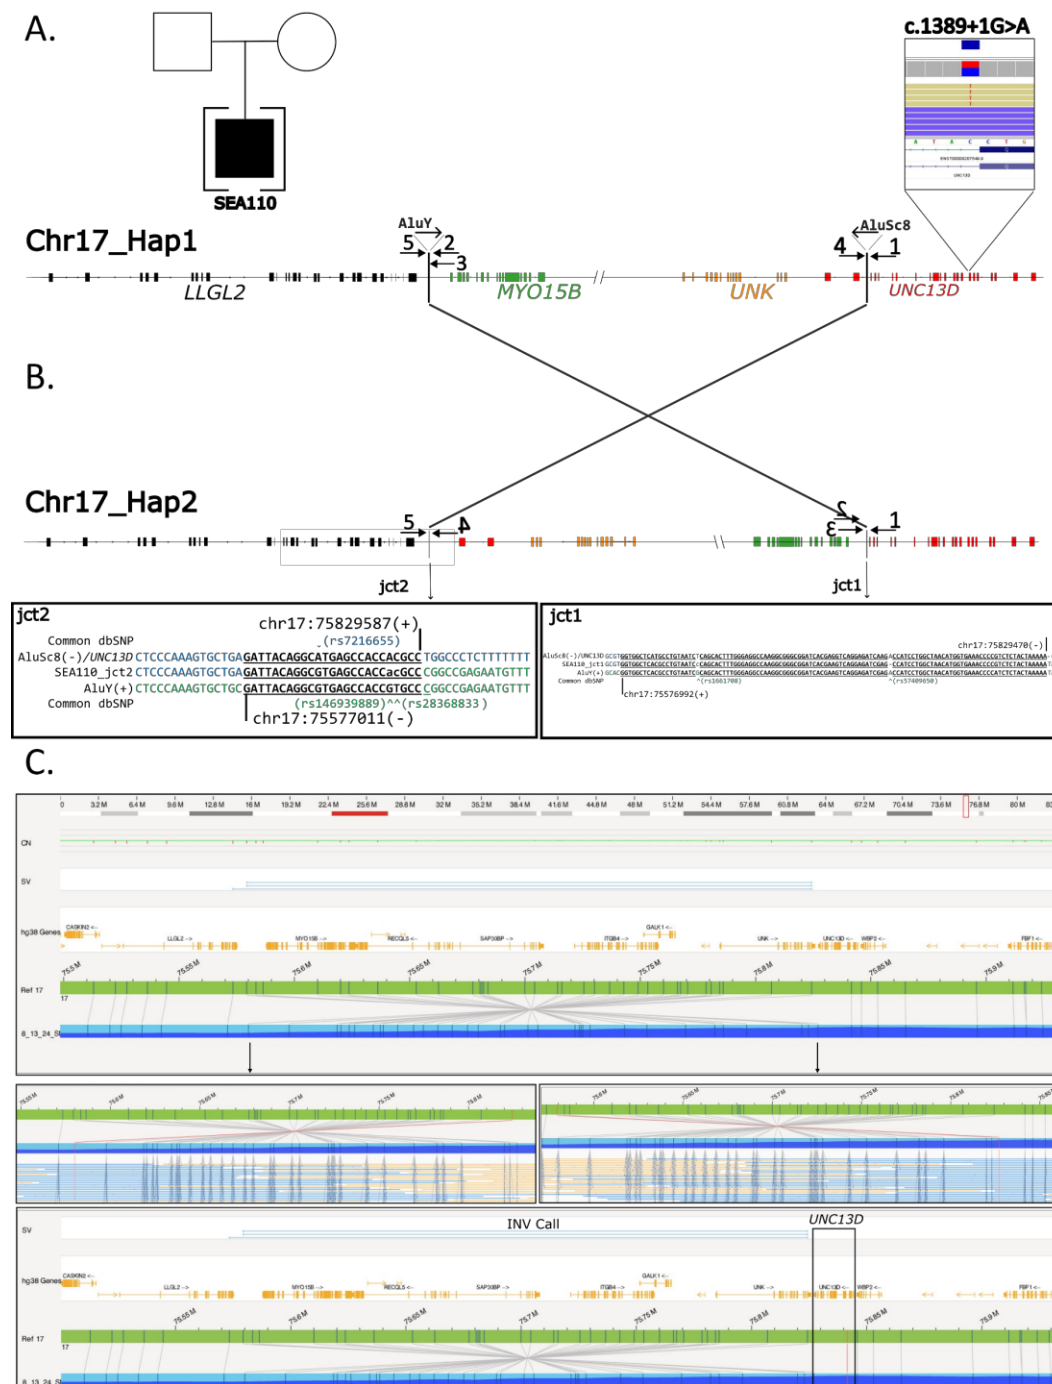

508

509 Figure 2. *UNC13D* variants in the patient. (A) Pedigree of patient SEA110 and IGV screenshot  
 510 displaying nanopore sequencing reads that detected the pathogenic SNV in *UNC13D*  
 511 (NM\_199242). Chr17\_Hap1 represents the haplotype carrying the SNV in *UNC13D*, the blowout  
 512 of *UNC13D* point to the approximate location of the SNV. (B) Diagram of Chr17\_Hap2, showing  
 513 the inversion junction sequencing alignments of each breakpoint. Arrows point to the alignments  
 514 for junctions 1 and 2 (jct1/2). PCR primers used to obtain the breakpoint junctions for Sanger  
 515 sequencing are indicated by arrows. Arrows are not to scale. (C) Optical Genome Mapping  
 516 showing the inversion in Chr17\_Hap2, panels show molecules spanning each junction and the  
 517 location of *UNC13D* relative to the inversion call.

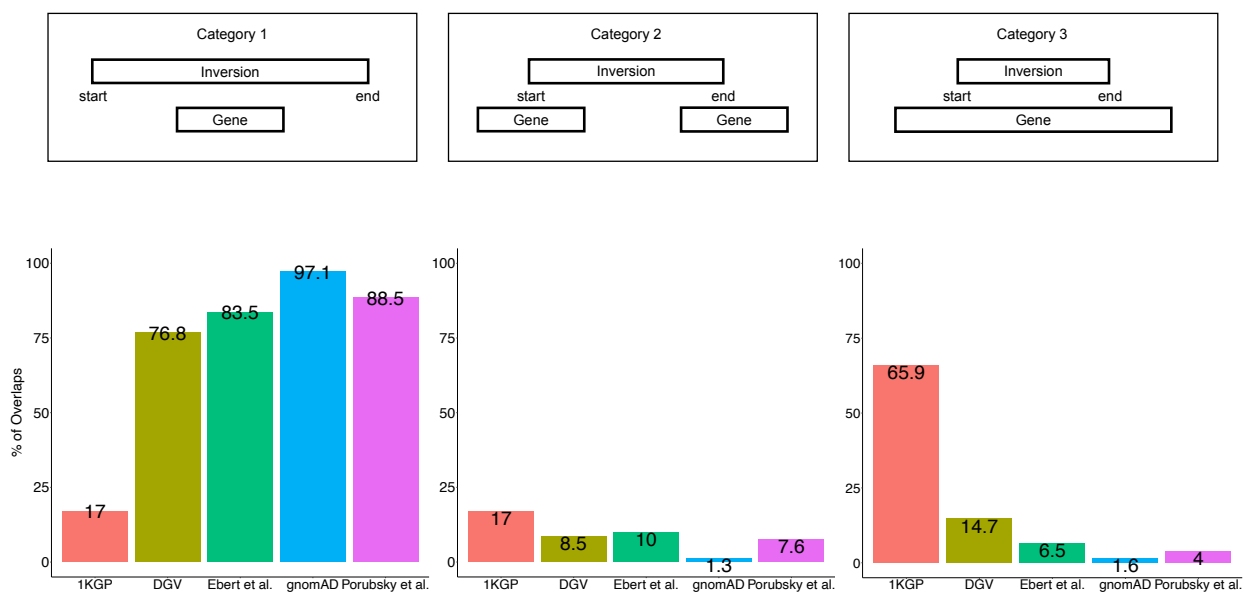

518  
 519 Figure 3. The categories of the intersections between inversions and protein-coding genes and  
 520 percentages of intersections belonging to these categories. We grouped the intersections  
 521 between inversions and OMIM phenotype-related genes into three categories. The first category  
 522 comprises genes covered by inversions, the second category includes intersections where one of

523 the inversion breakpoints is located within a gene region, and the third category involves  
 524 inversions occurring within a gene region.

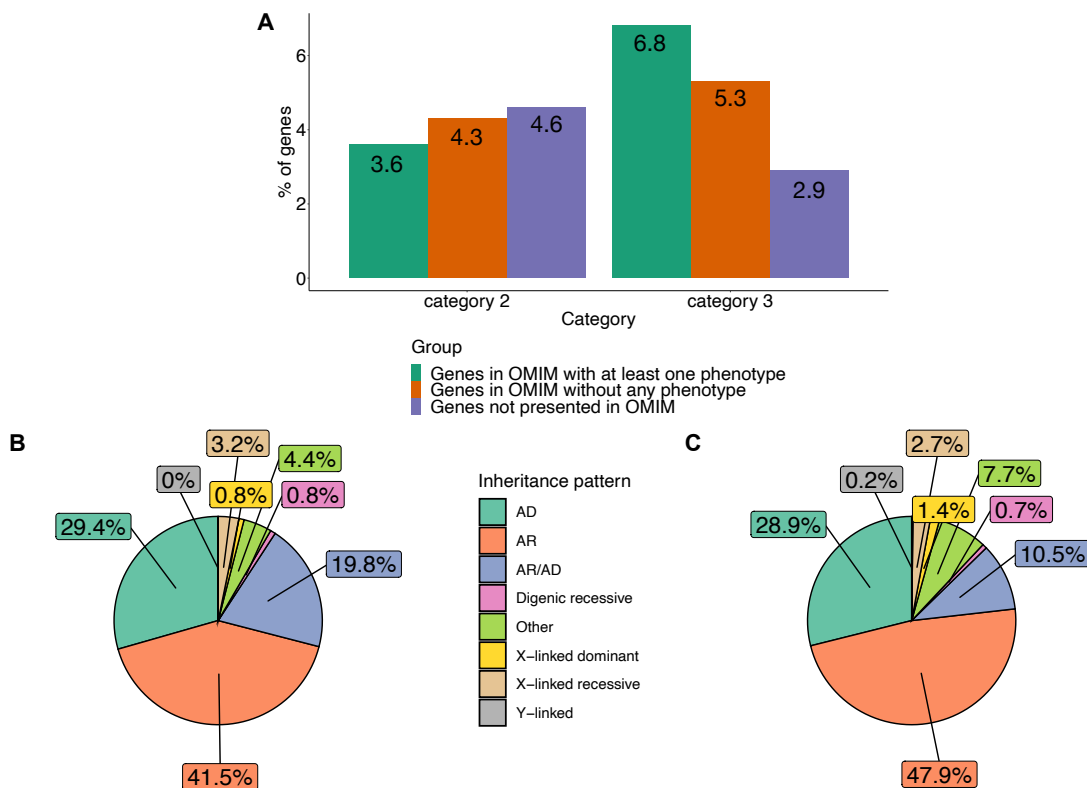

525  
 526 Figure 4. (A) Number of OMIM phenotype-related genes (protein-coding) overlapping with the  
 527 inversions in all datasets in category 2 and 3. (B) Inheritance pattern of the genes overlapping  
 528 with all inversions in category 2. (C) Inheritance pattern of the genes overlapping with all  
 529 inversions in category 3.

### 530 SUPPLEMENTARY INFORMATION

531 Supplementary Figure 1. Barplot of the transcript types of the genes in GENCODE v46.

532 Supplementary Figure 2. IGV visualization of the detected variants in SEA110. (A) Illustration of  
 533 which mapped reads correspond to each junction, reads mapping to jct2 are the reads

534 highlighted in red with soft clipping extending to green, while reads highlighted in green with soft  
535 clipping extending into red map to junction 1. (B) Manual phasing of c.1389+1G>A to the non-  
536 inverted haplotype. Black boxes highlight SNPs that are represented unique to the SNV  
537 haplotype. The dashed black light indicates a read that extends past jct2 from the inversion and  
538 contains c.1389+1G>A.

539 Supplementary Figure 3. The *UNC13D* inversion in gnomAD.

540 Supplementary Figure 4. Rare and common inversions in gnomAD. (A) 99% of inversions in  
541 gnomAD v4.0 are rare with <0.5% frequency. (B) Number of genes intersecting with common  
542 inversions in gnomAD v4.0 based on category 2 and 3. (C) Number of genes intersecting with rare  
543 inversions in gnomAD v4.0 based on category 2 and 3.

544 Supplementary Figure 5. The log<sub>2</sub> transformed length plot of the inversion sizes in the datasets.

545 Supplementary Figure 6. Plot of number of common and dataset-specific inversions in the  
546 datasets.

547 Supplementary Figure 7. Comparison of inversions in each dataset based on overlapping at least  
548 50% of sequence length.

549 Supplementary Figure 8. The protein-coding genes that are related to a phenotype in OMIM  
550 overlapping with inversions. (A) The percentage of the OMIM phenotype-related genes  
551 overlapping inversions in category 2. (B) The percentage of the OMIM phenotype-related genes  
552 overlapping inversions in category 3. (C) The pie charts of inheritance patterns of genes  
553 overlapping with inversions in each dataset based on category 2. (D) The pie charts of inheritance  
554 patterns of genes overlapping with inversions in each dataset based on category 3.

555 Supplementary Table 1. Primer sets used in the study.

556 Supplementary Table 2. References of DGV inversions.

557 Supplementary Table 3. Rare gnomAD inversions-genes intersections in category 2 and 3.

558 Supplementary Table 4. Rare gnomAD inversions with homozygous frequency 0 - OMIM AR genes  
559 intersections in category 2 and 3.

560 Supplementary Table 5. Inversion-gene intersections from all datasets in category 2.

561 Supplementary Table 6. Inversion-gene intersections from all datasets in category 3.

562 Supplementary Table 7. Enriched HPO terms for the protein-coding genes intersecting with the  
563 inversions in all datasets in category 2.

564 Supplementary Table 8. Enriched HPO terms for the protein-coding genes intersecting with the  
565 inversions in all datasets in category 3.

566

567

568

569

570

571
