# Supplementary material for: Investigation of a Pathogenic Inversion in UNC13D and Comprehensive Analysis of Chromosomal Inversions Across Diverse Datasets
Source: bioRxiv or medRxiv preprint supplement (doi:10.1101/2024.10.28.24315942), 2024-10-29
Supplement: Supplementary file [file media-1.pdf]

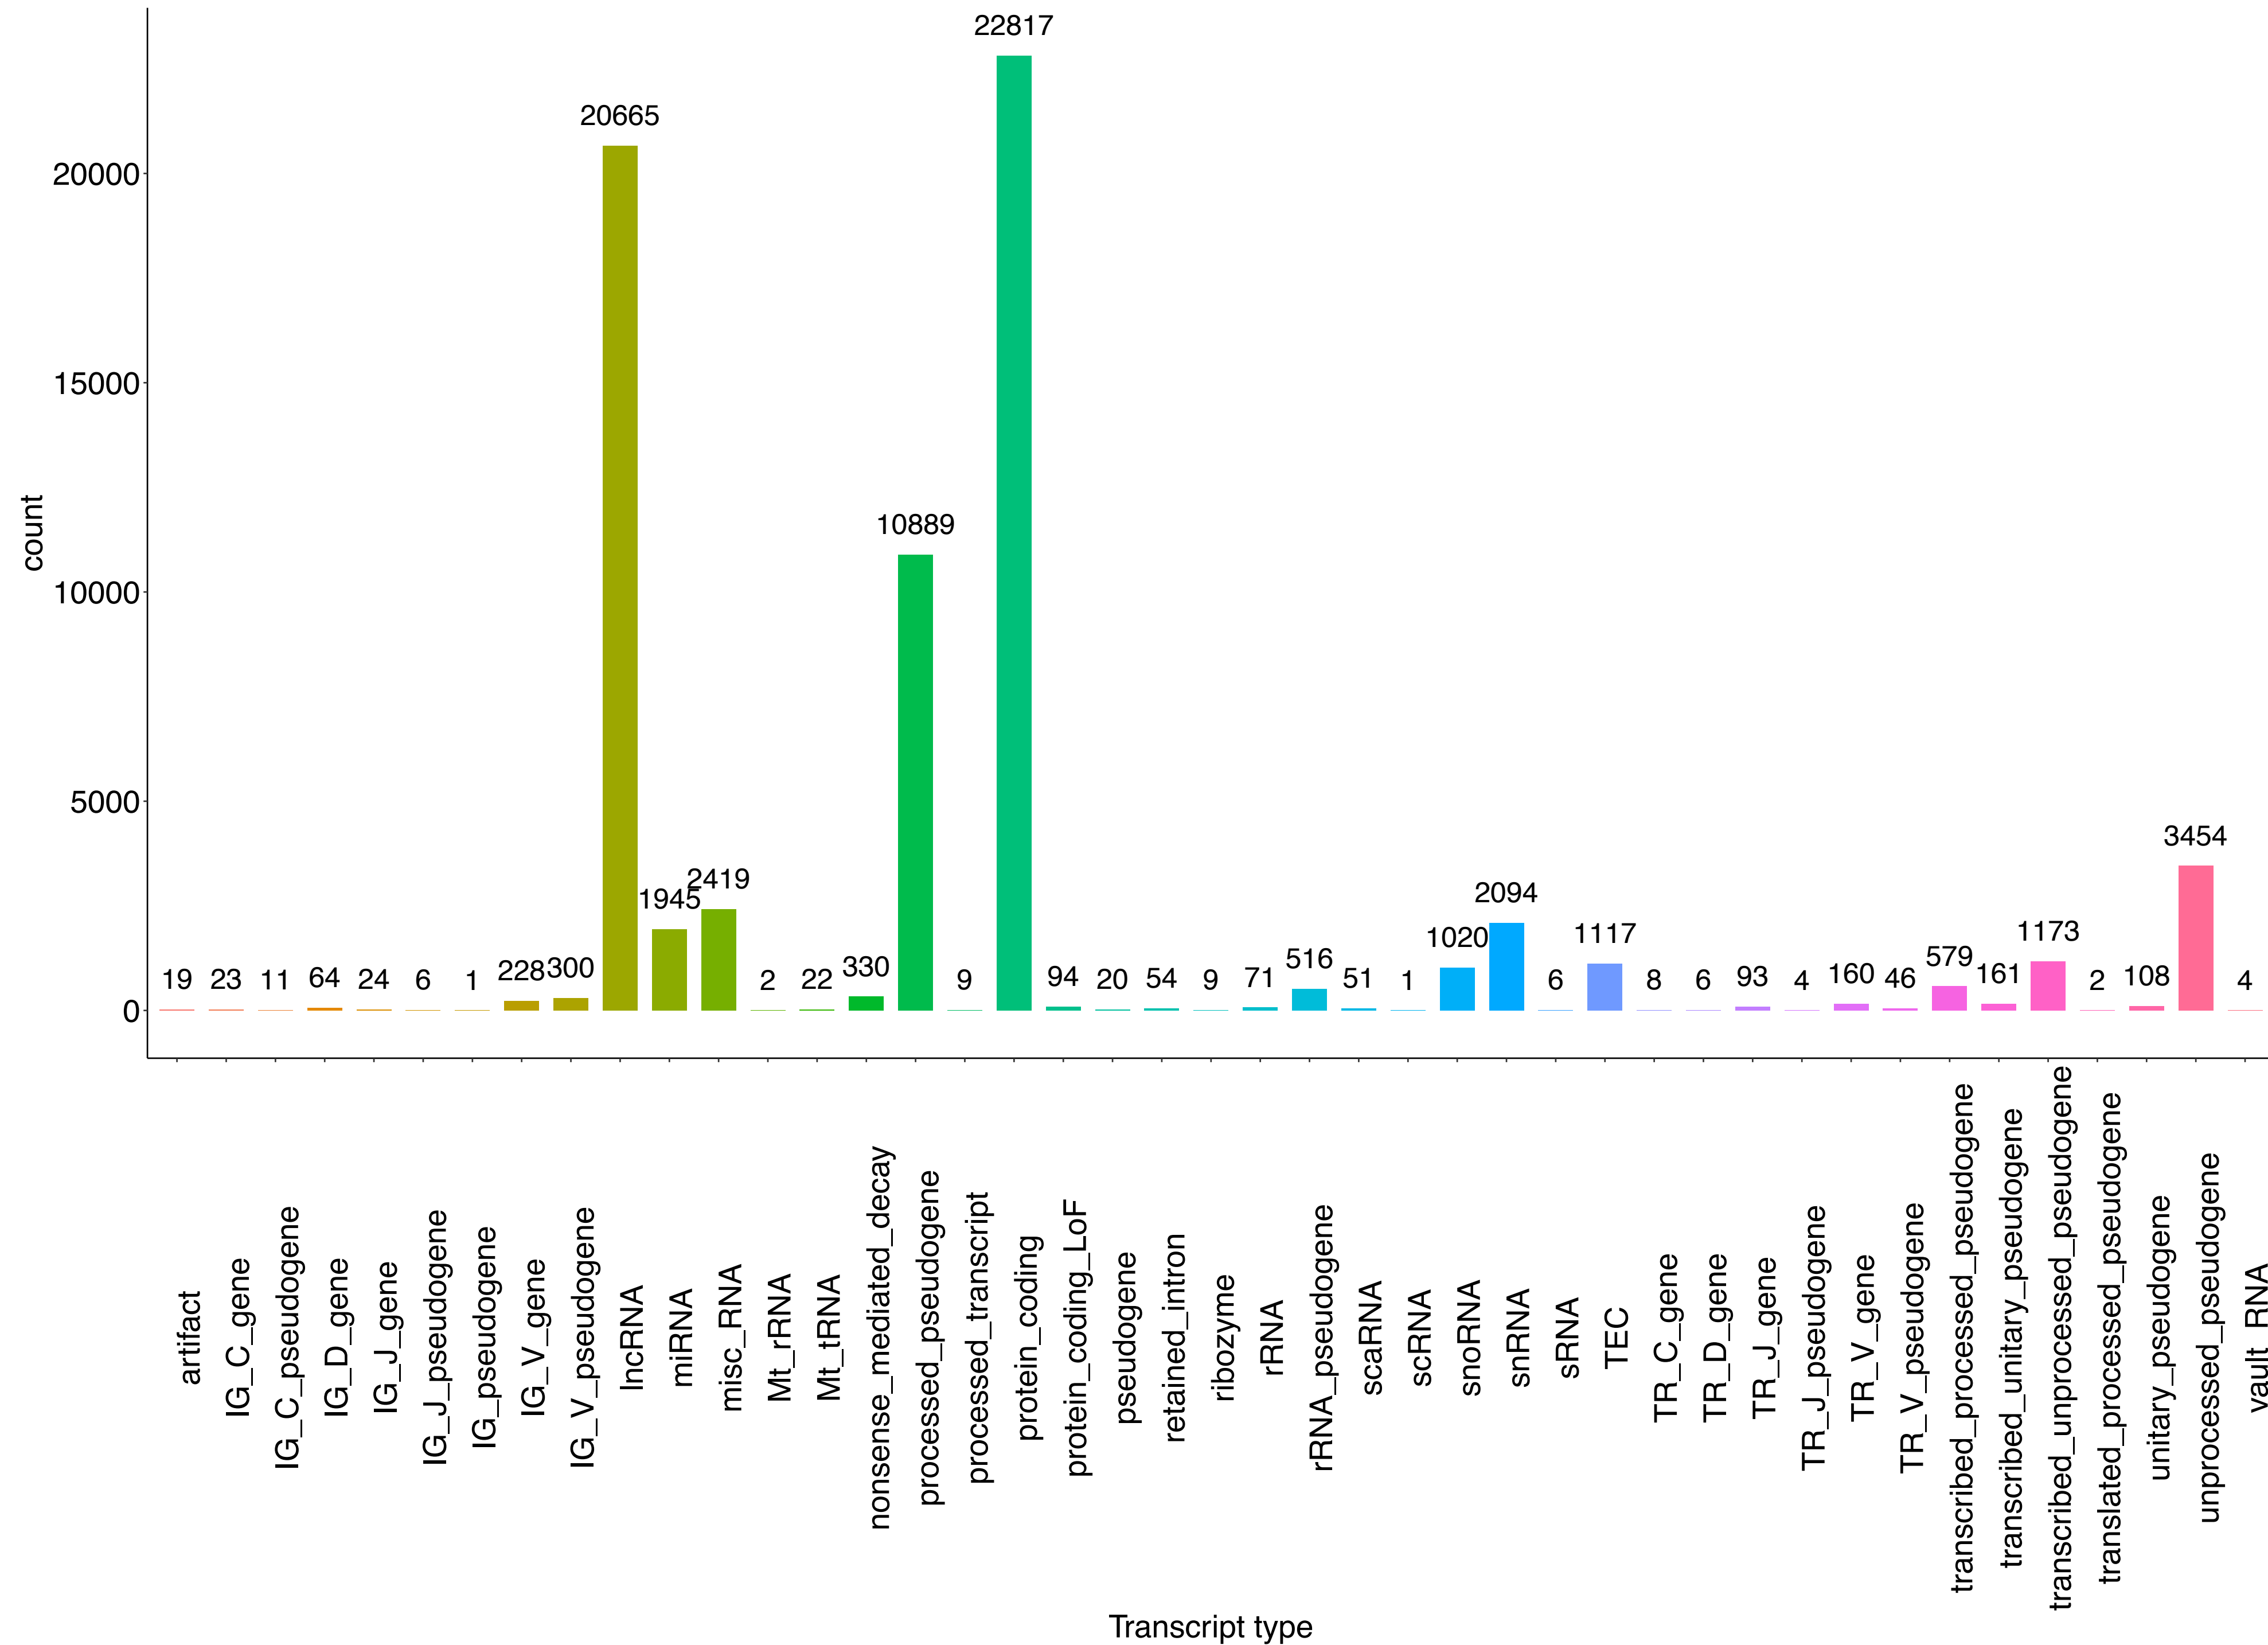

Supplementary figure 1

**A**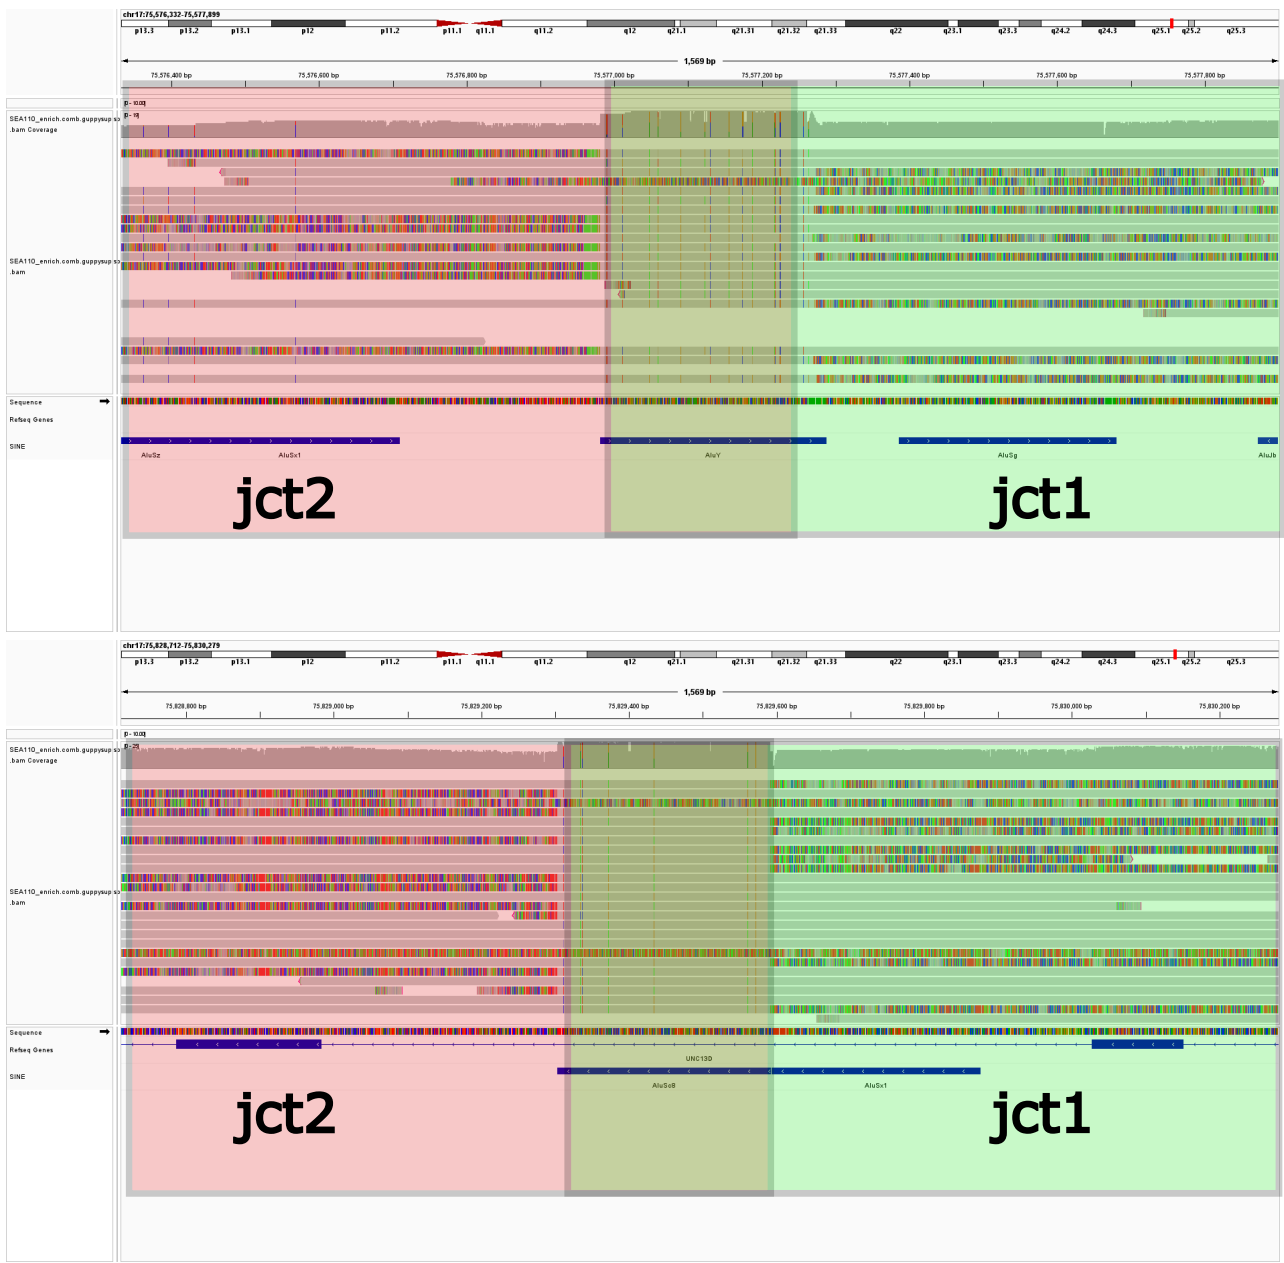**B****SNV (manual phasing)**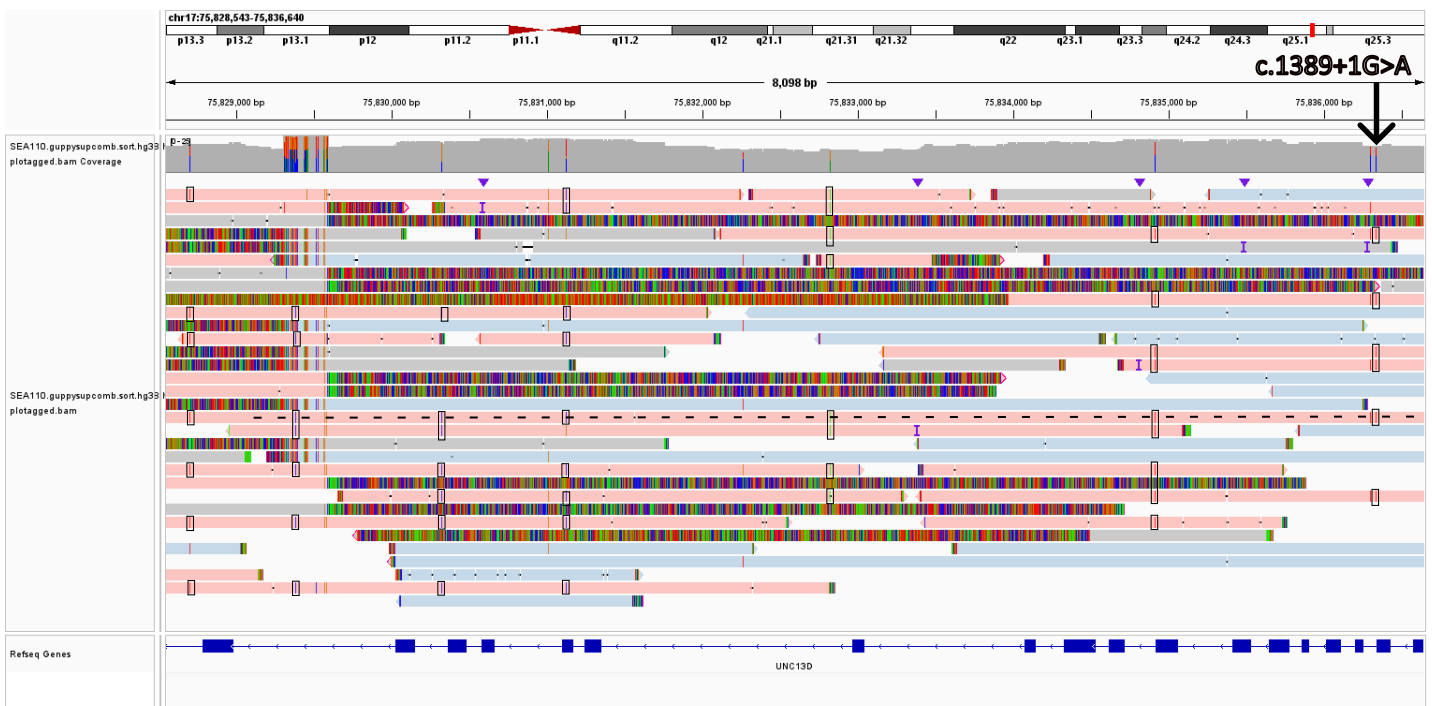**Supplementary figure 2**

Filter **Pass**

**Allele Count** 8

**Allele Number** 126092

**Allele Frequency** 0.00006345

**Quality score** 1

**Position** [17:75576924-75829482](#)

**Size** 252,558 bp

**Class** inversion ⓘ

**Evidence** Anomalous paired-end reads

**Algorithms** TEXT NEEDED FOR ALGORITHM LABEL "rescan", Manta

## External Resources

- [UCSC](#)

## Feedback

[Report an issue with this variant](#)

## Genetic Ancestry Group Frequencies

| Genetic Ancestry Group     | Allele Count | Allele Number | Number of Homozygotes | Allele Frequency  |
|----------------------------|--------------|---------------|-----------------------|-------------------|
| ▶ Admixed American         | 2            | 12594         | 0                     | 0.0001588         |
| ▶ European (Finnish)       | 1            | 6476          | 0                     | 0.0001544         |
| ▶ European (non-Finnish)   | 5            | 59088         | 0                     | 0.00008462        |
| ▶ African/African American | 0            | 33816         | 0                     | 0.000             |
| ▶ Amish                    | 0            | 842           | 0                     | 0.000             |
| ▶ Ashkenazi Jewish         | 0            | 3180          | 0                     | 0.000             |
| ▶ East Asian               | 0            | 4054          | 0                     | 0.000             |
| ▶ Middle Eastern           | 0            | 64            | 0                     | 0.000             |
| ▶ Remaining                | 0            | 1572          | 0                     | 0.000             |
| ▶ South Asian              | 0            | 4406          | 0                     | 0.000             |
| XX                         | 3            | 65800         | 0                     | 0.00004559        |
| XY                         | 5            | 60292         | 0                     | 0.00008293        |
| <b>Total</b>               | <b>8</b>     | <b>126092</b> | <b>0</b>              | <b>0.00006345</b> |

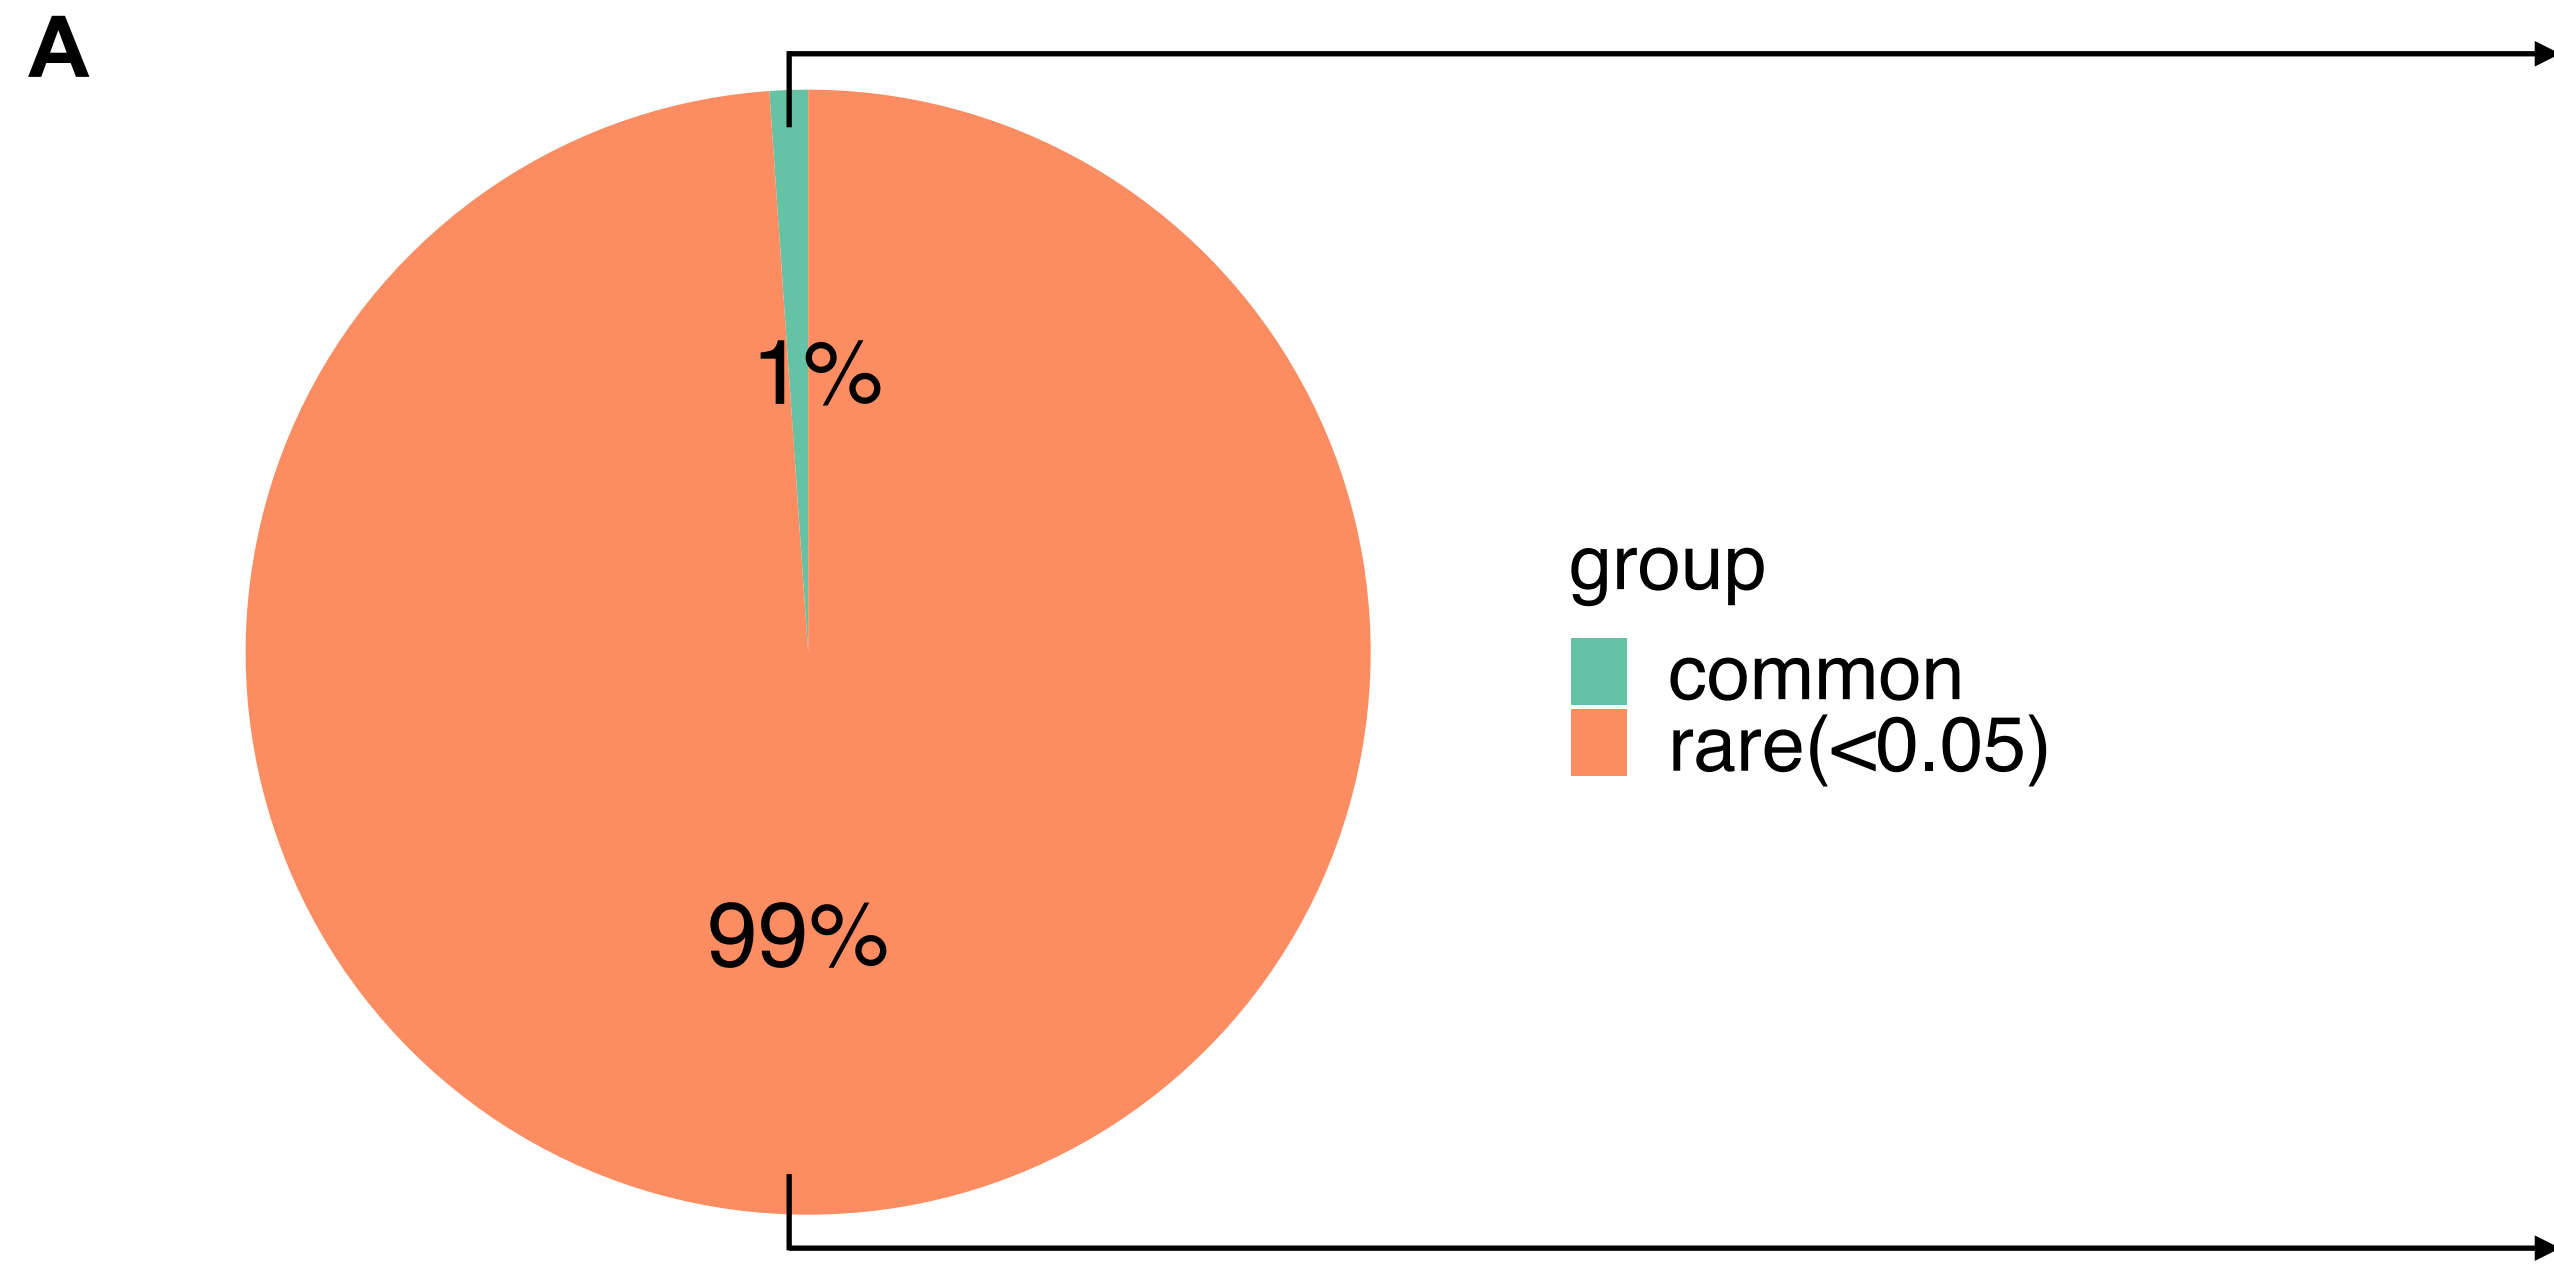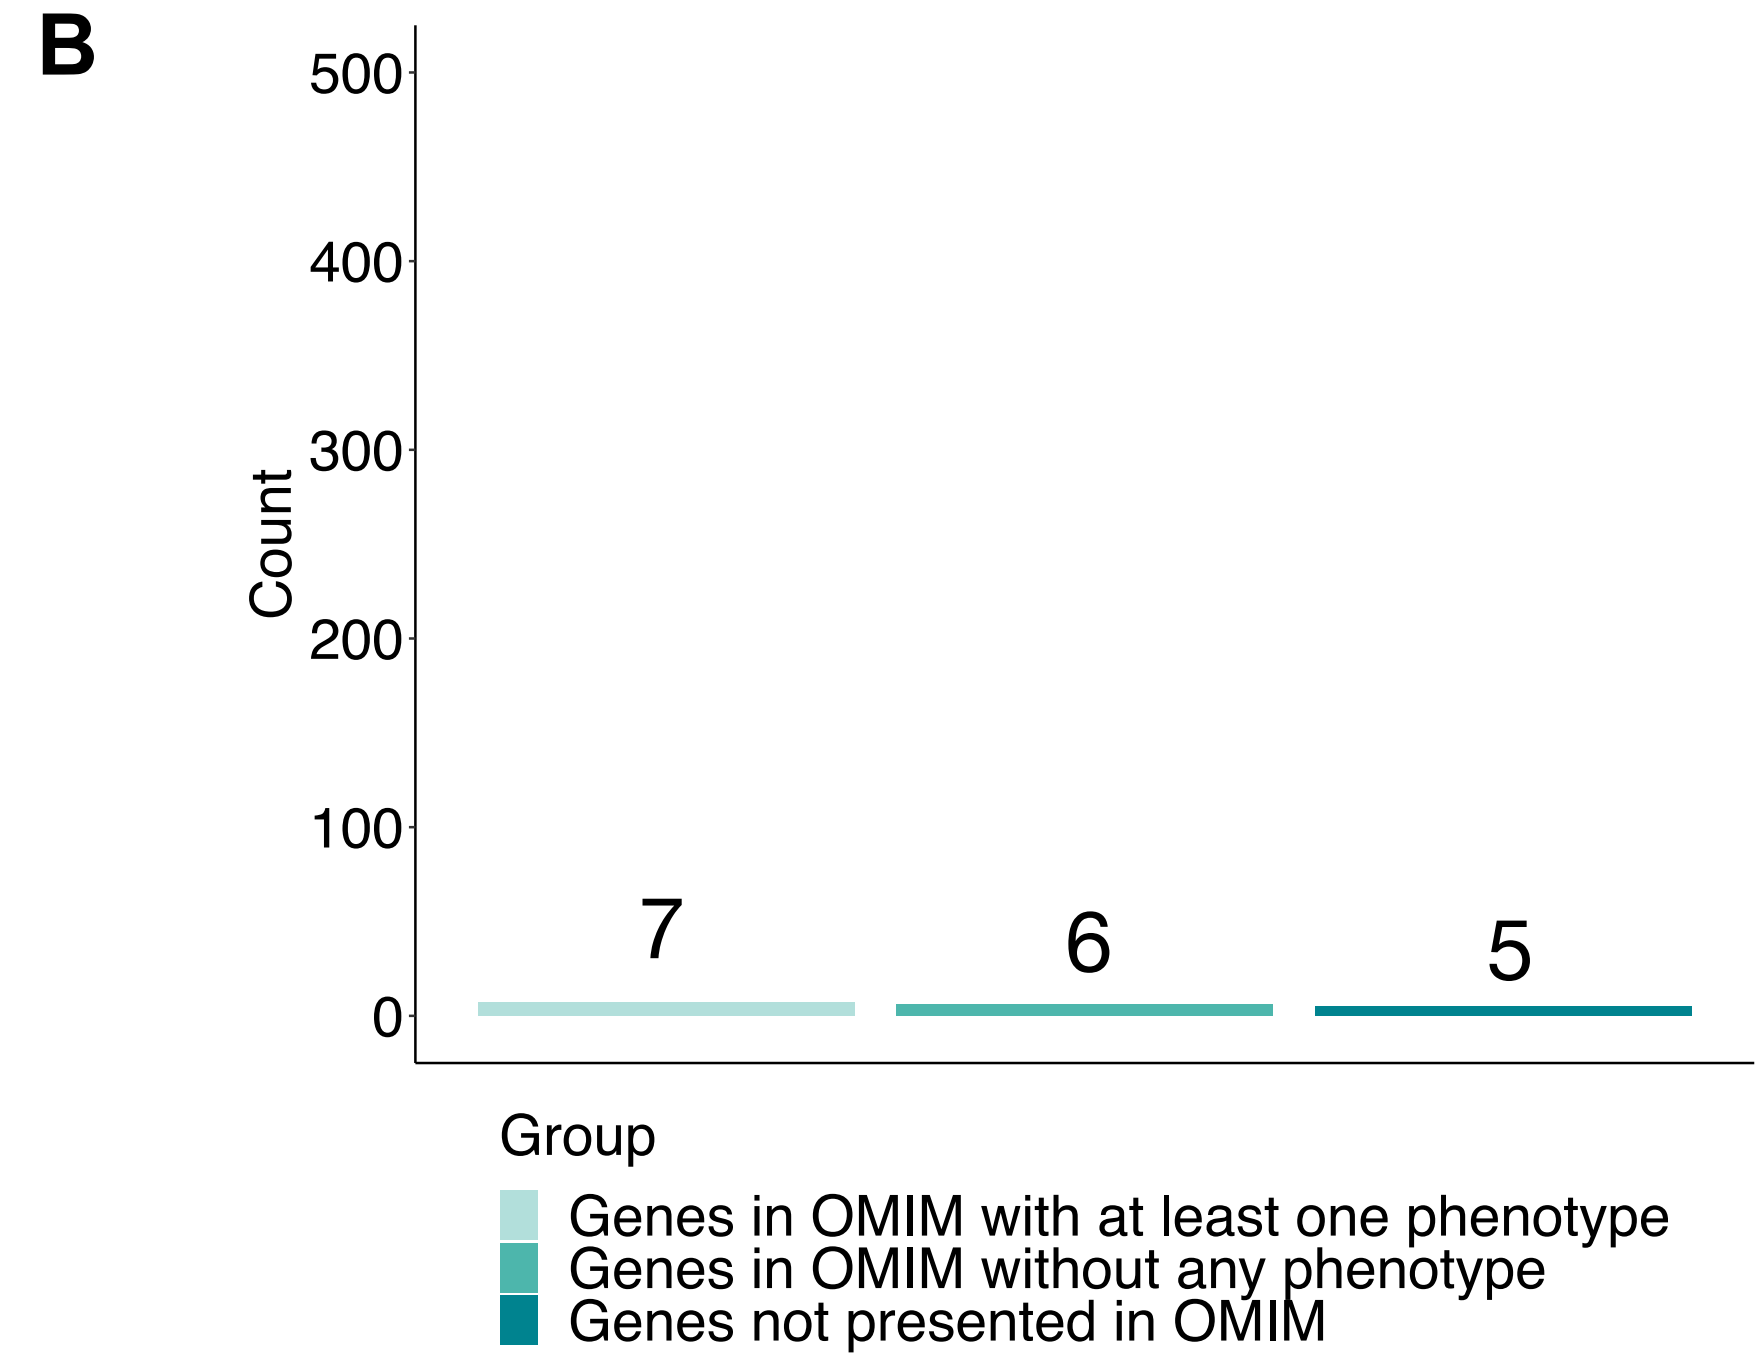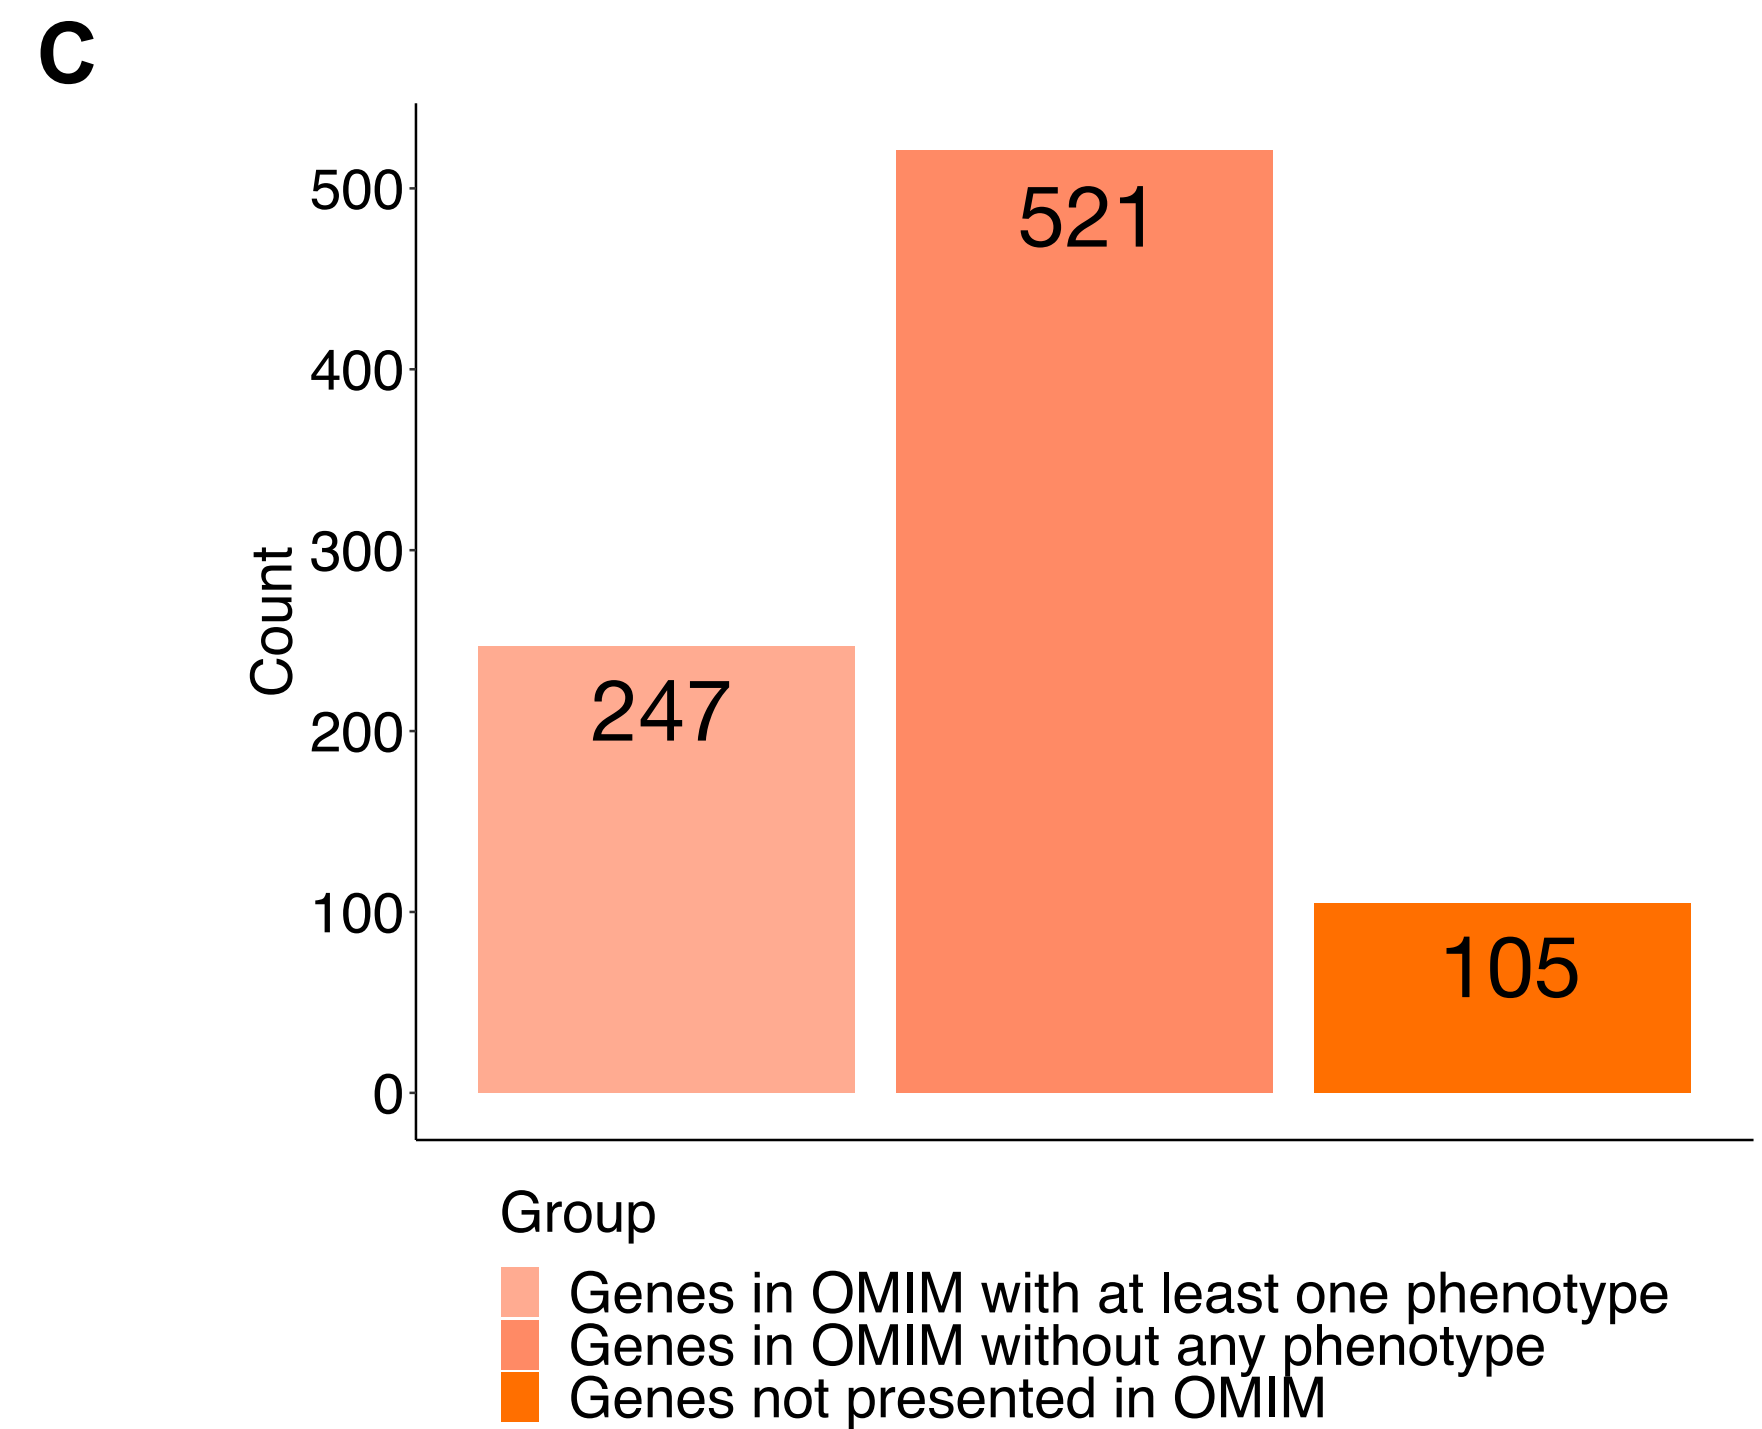



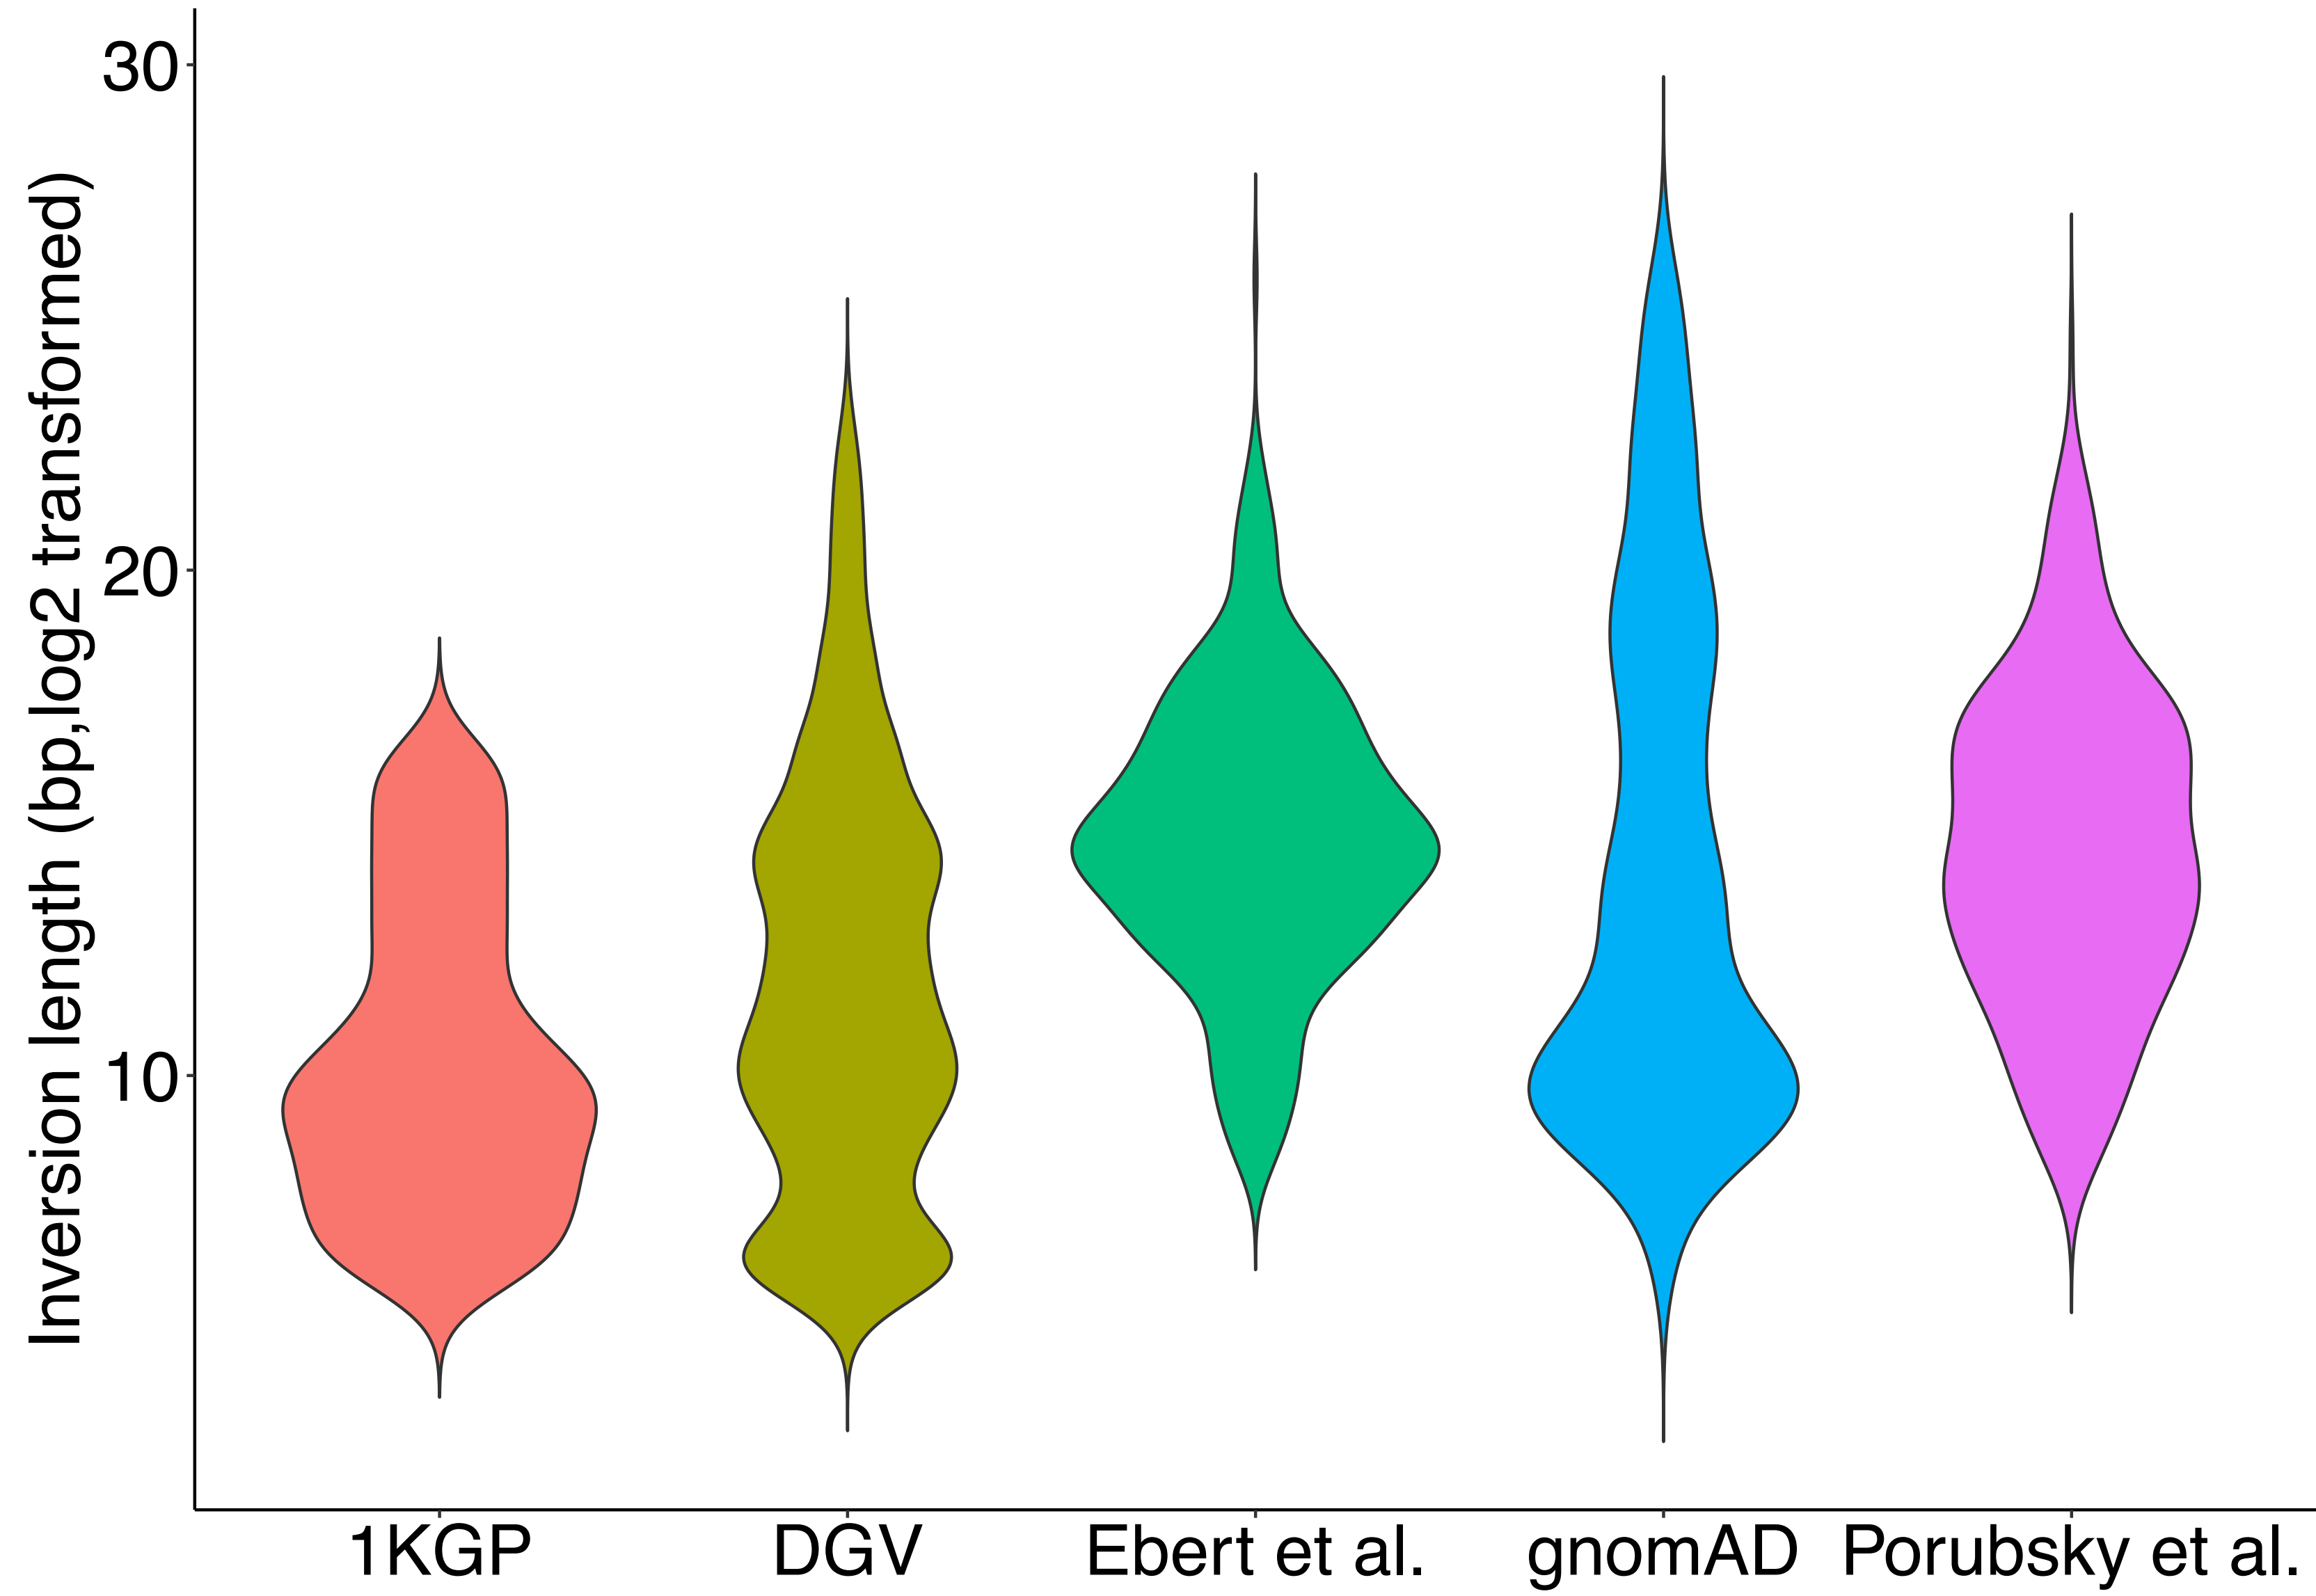

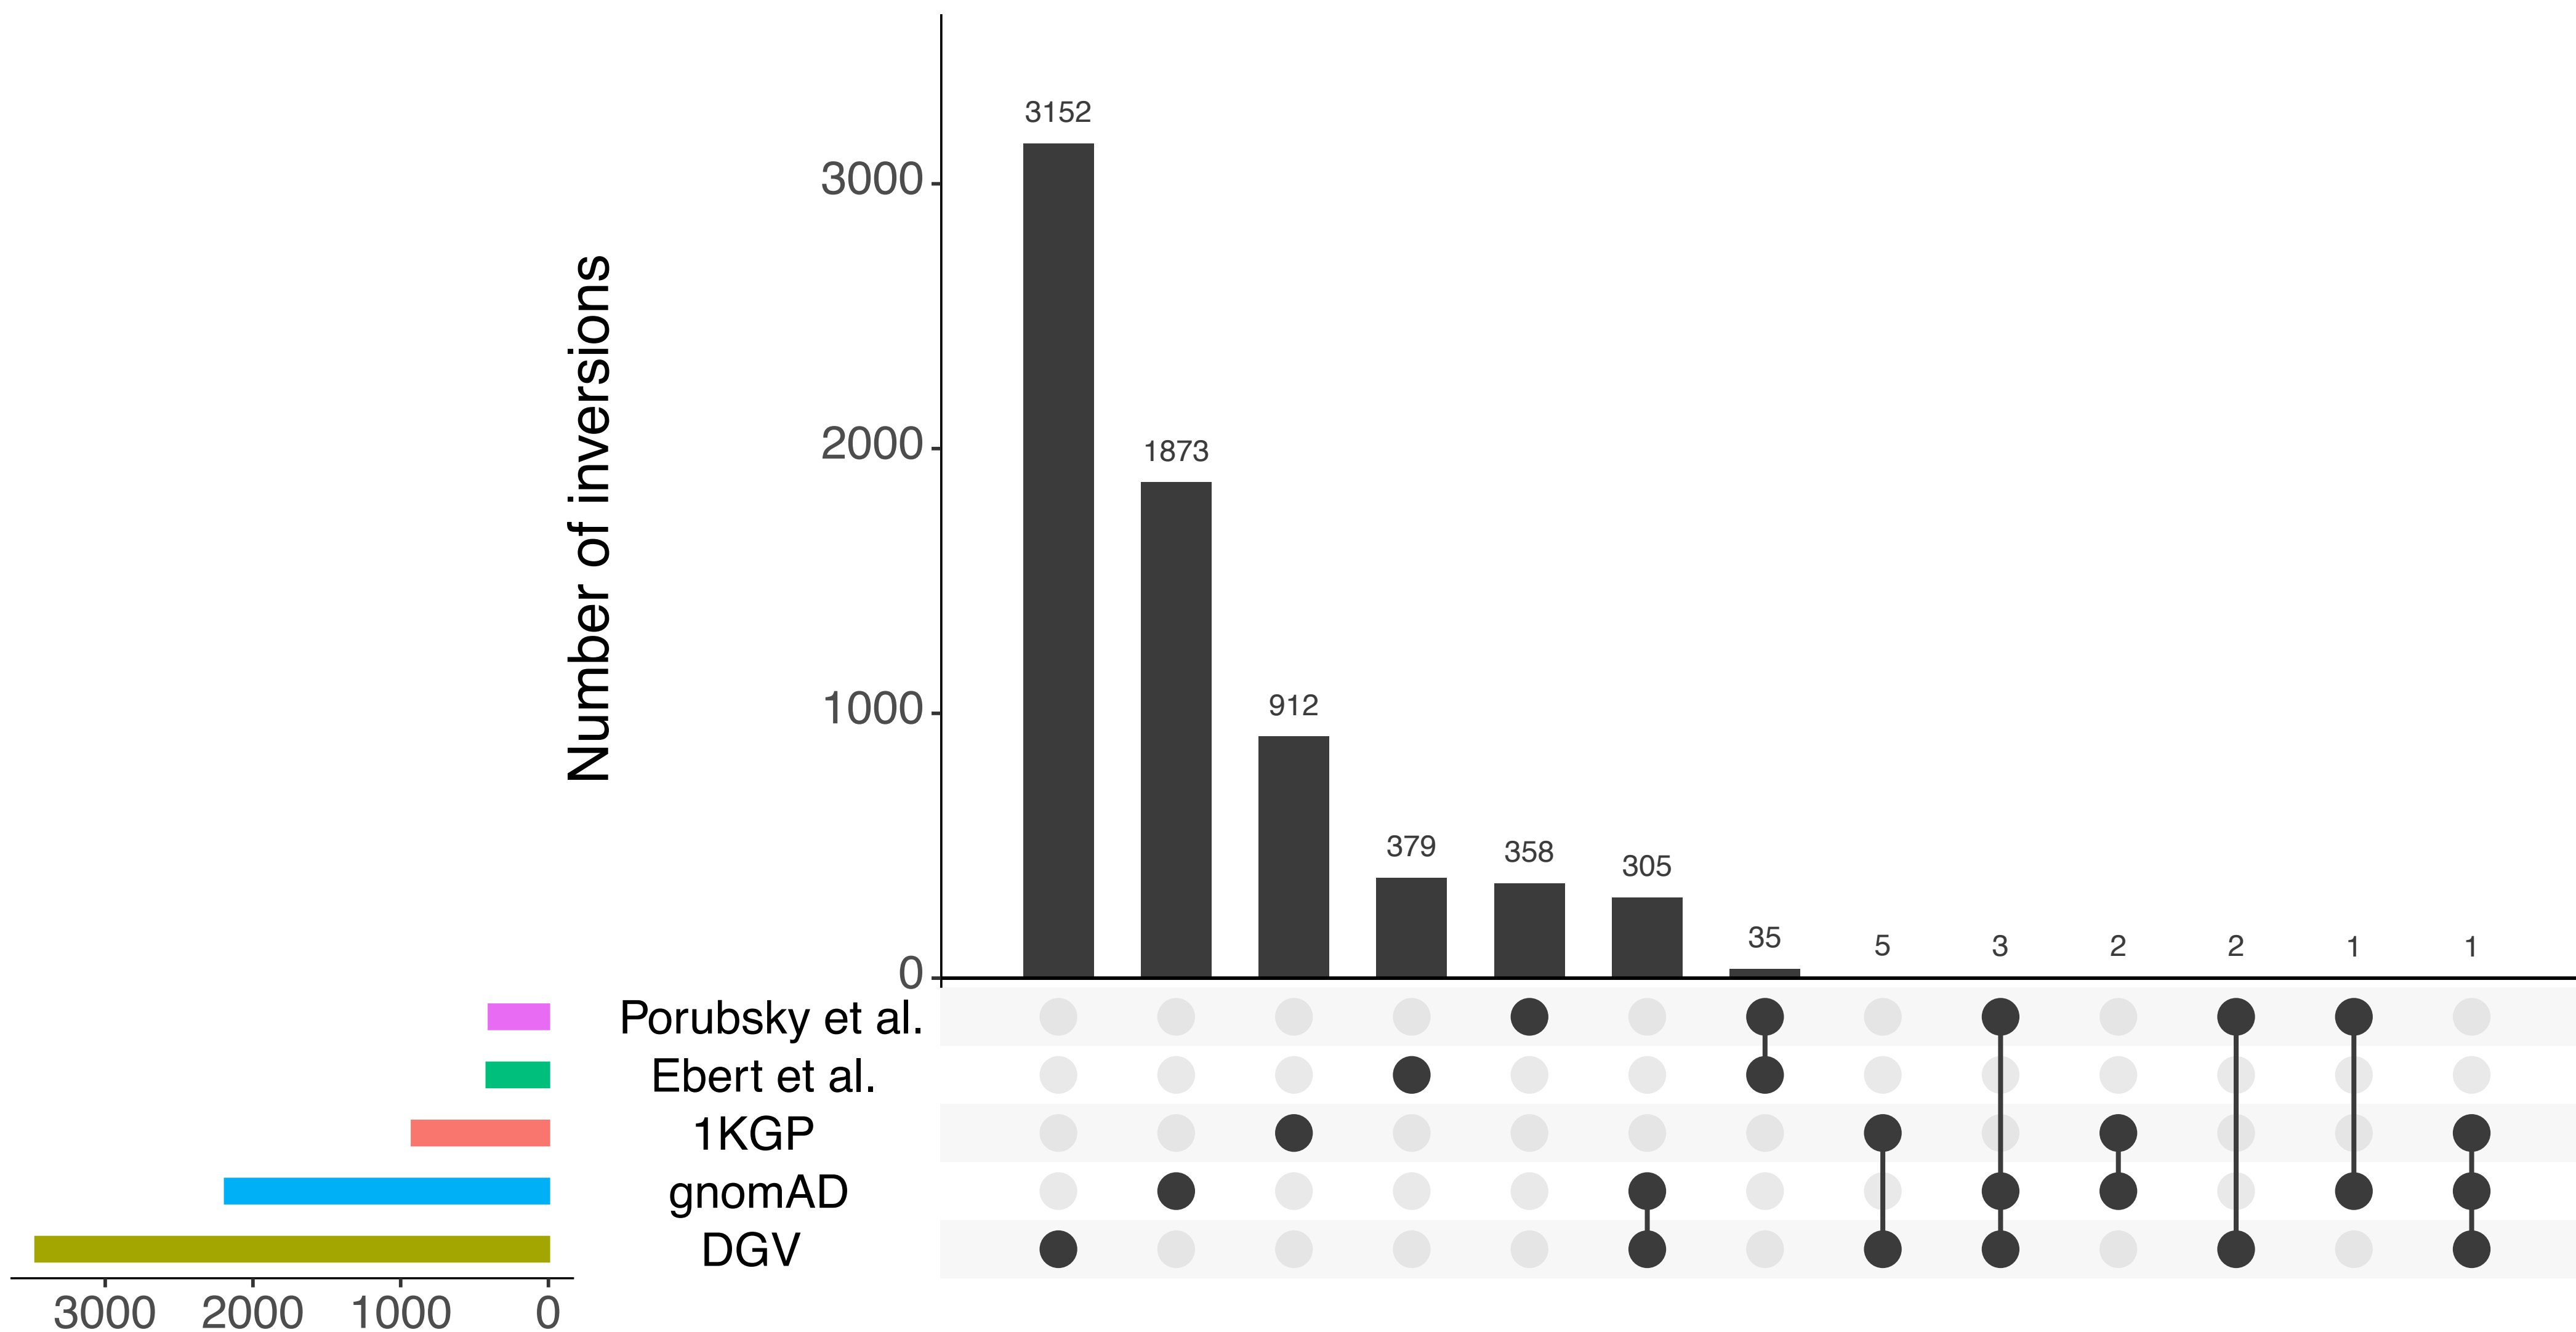

Supplementary figure 6

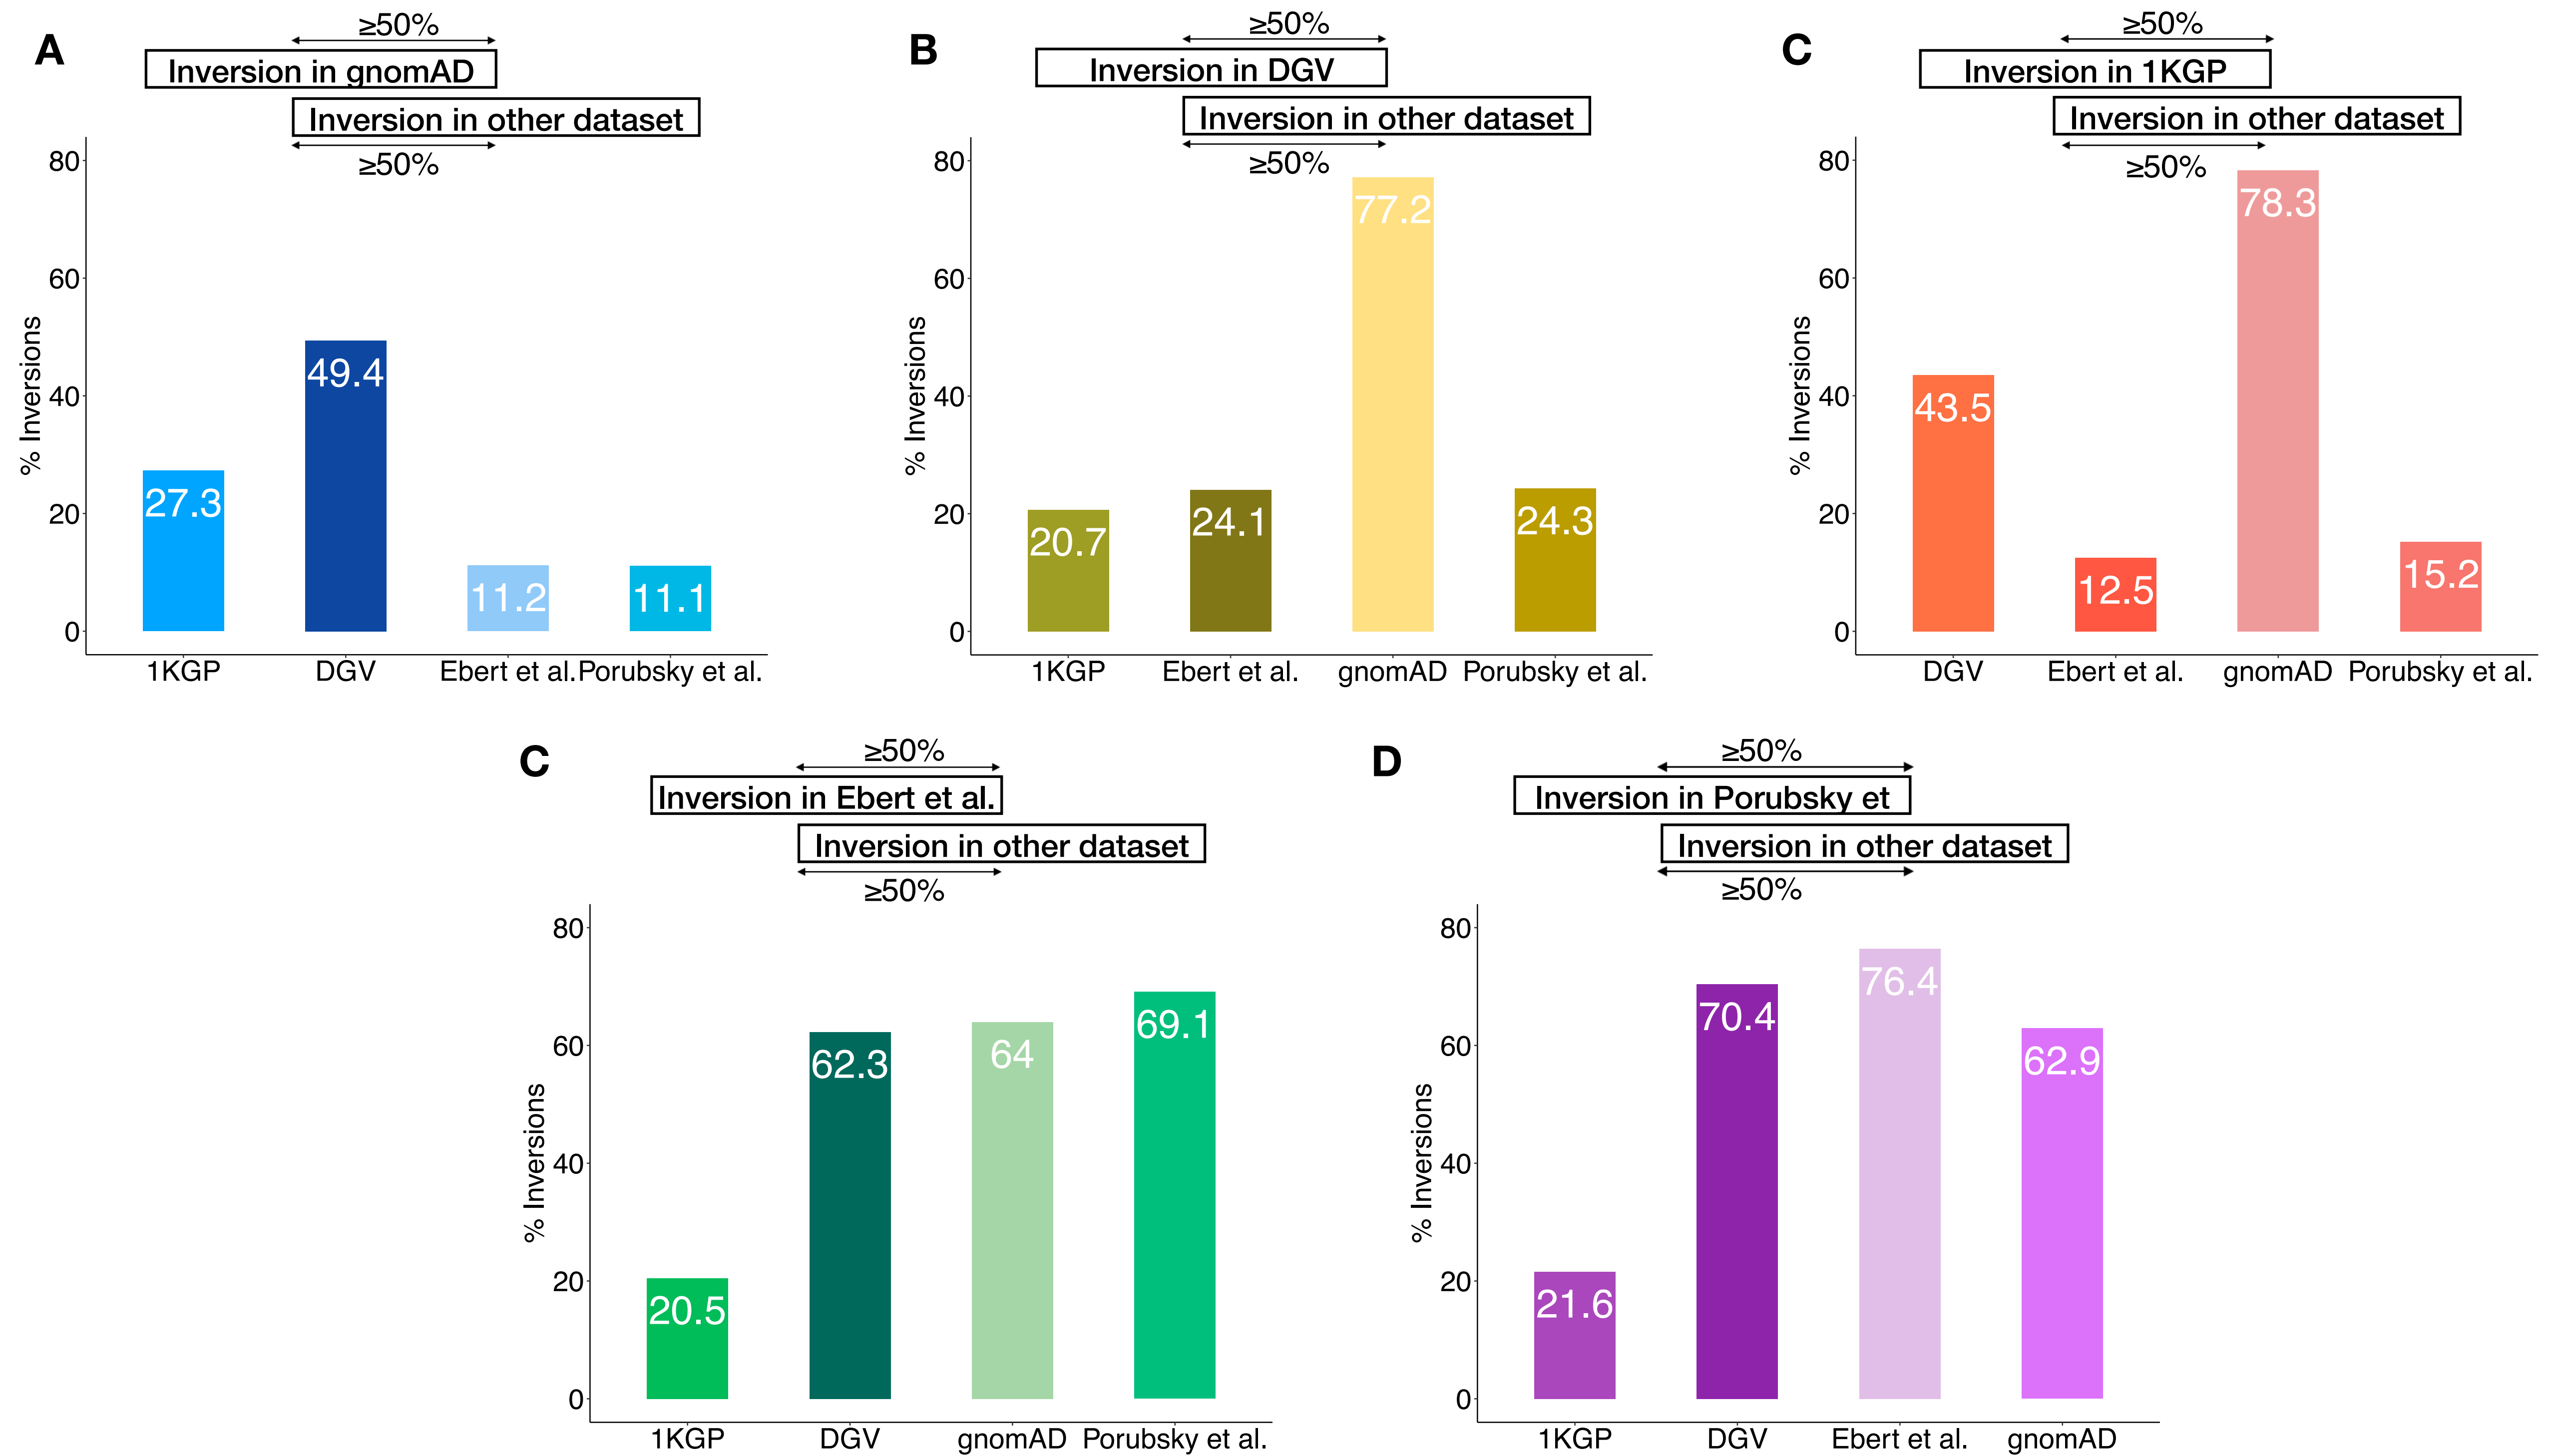

Supplementary figure 7

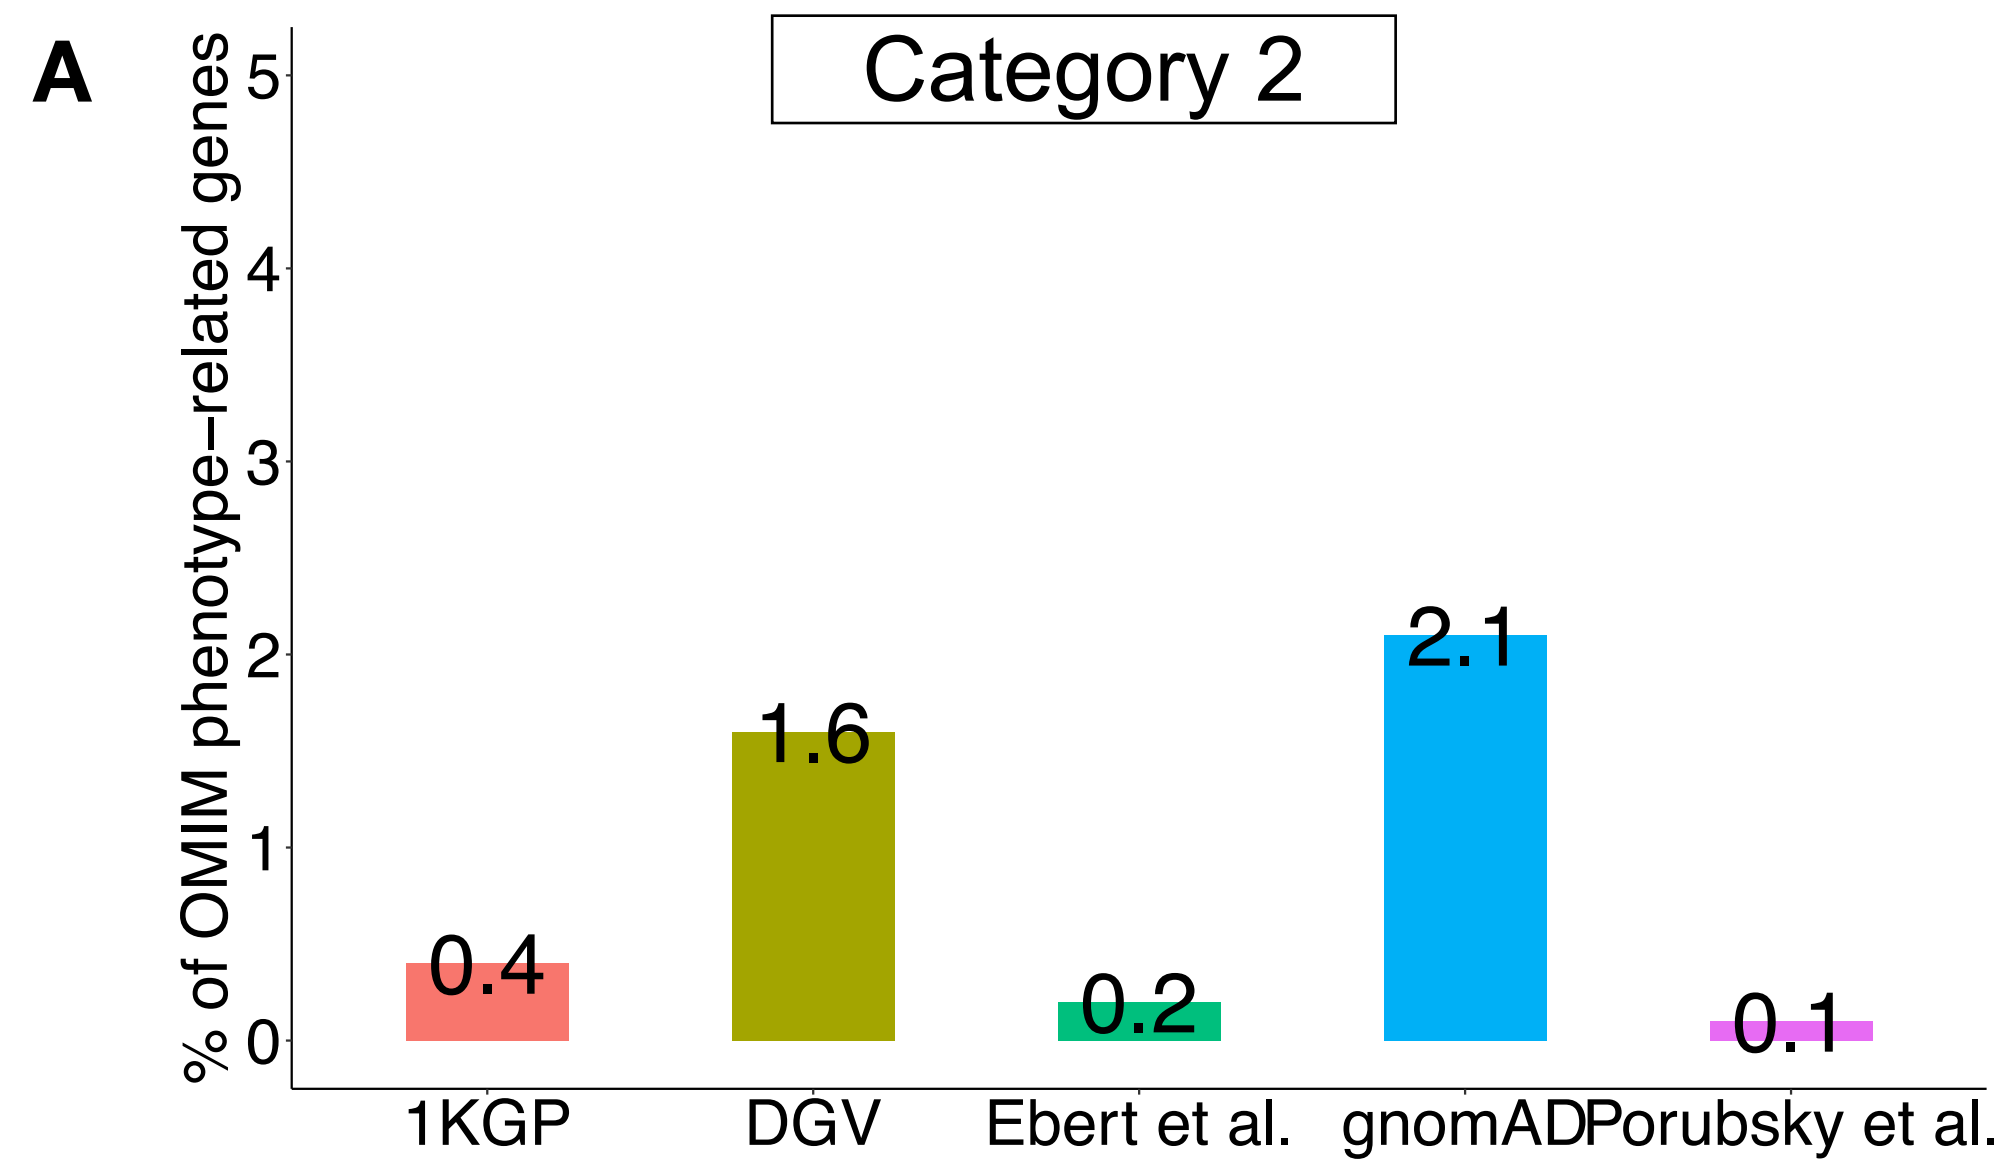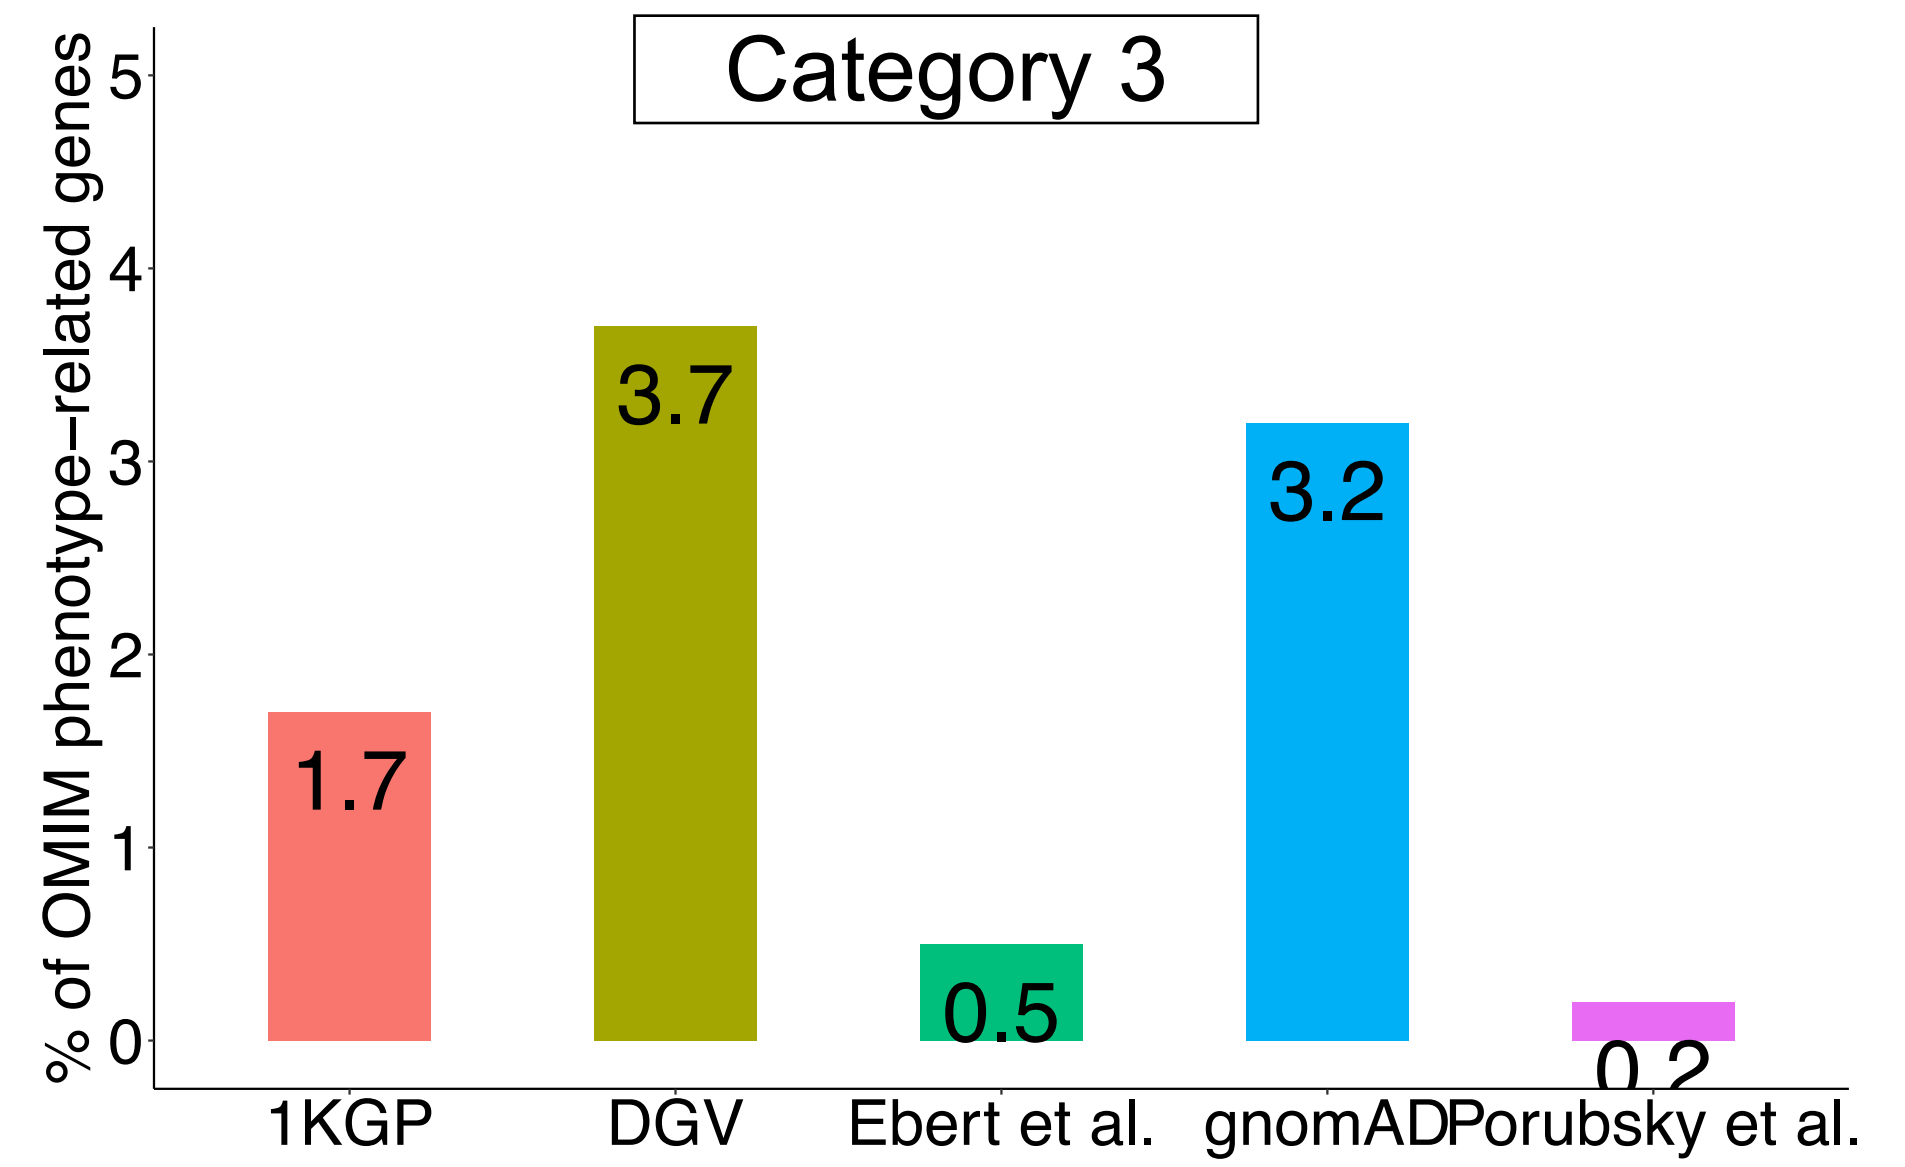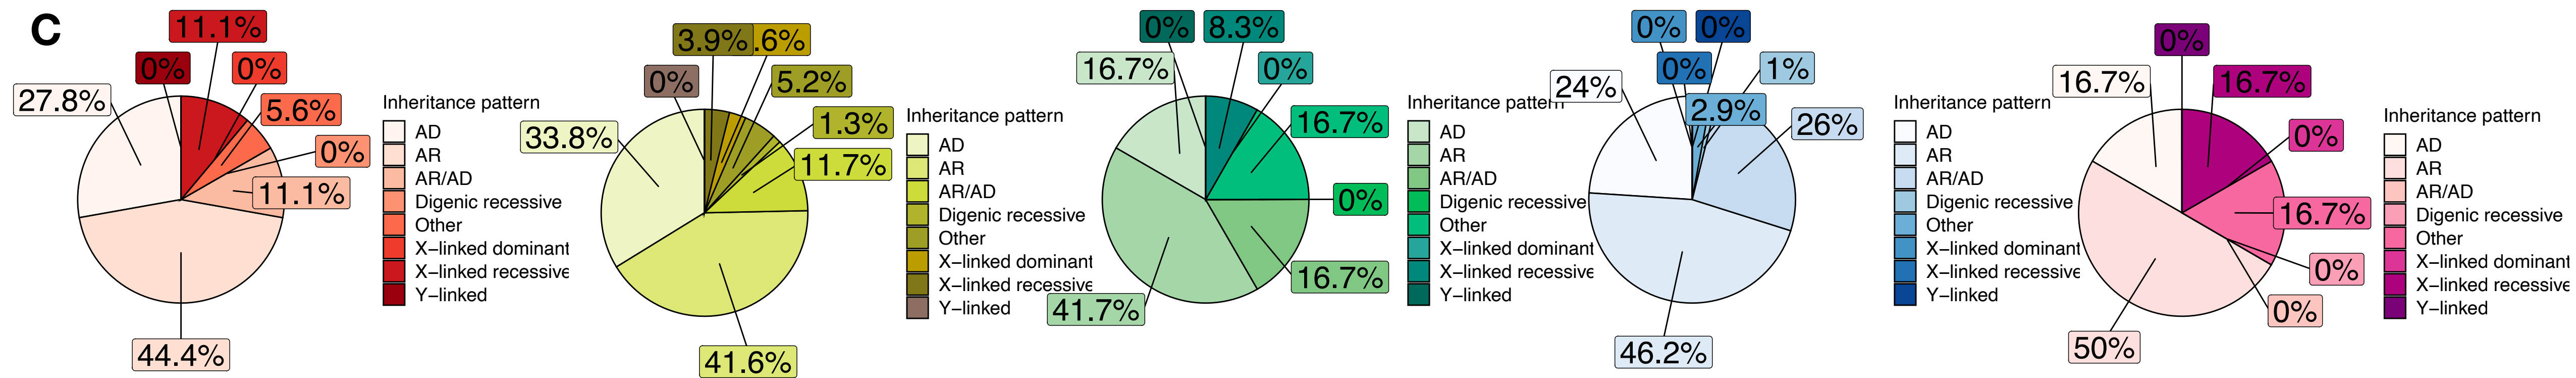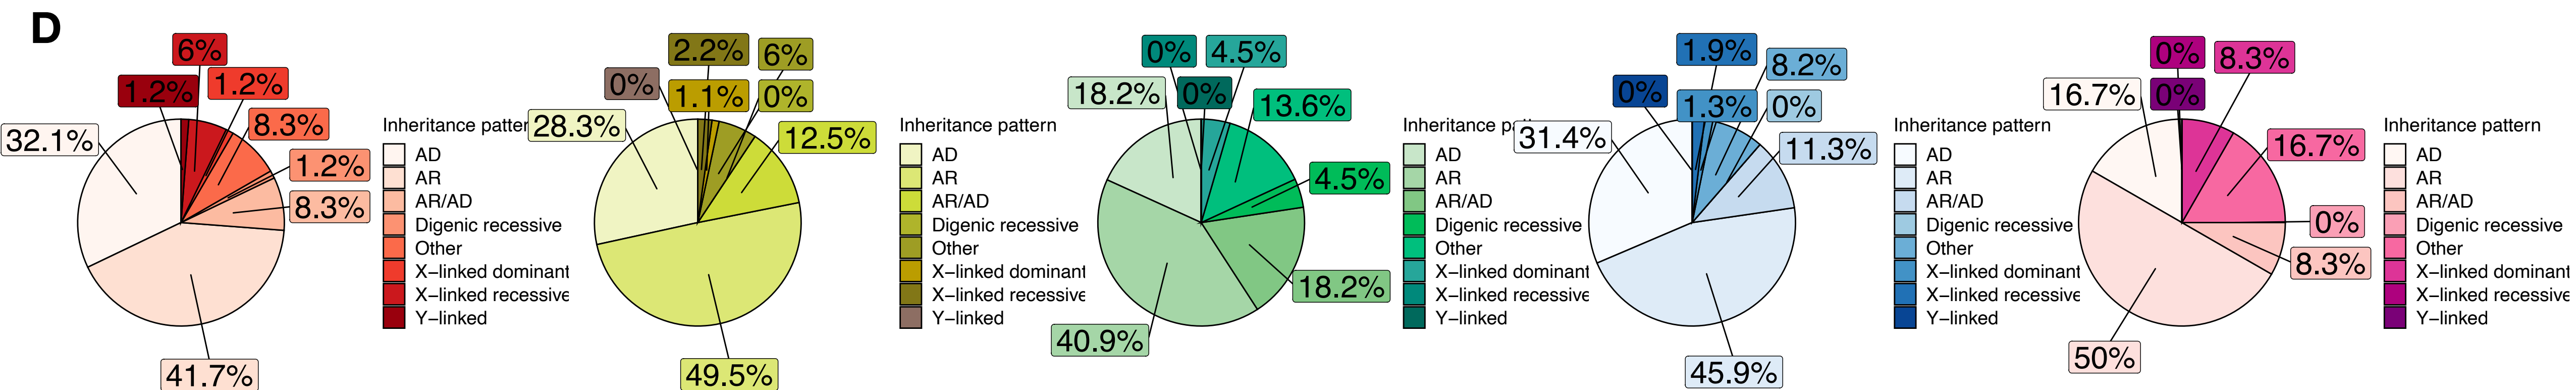

Supplementary figure 8
